# Supplementary material
Source: MDPI journal article supplement (https://www.mdpi.com/1999-4907/10/8/650)
Supplement: s1 [file s1]

## Sheet: Sheet1
plot number	plot size	stand volume	average height	average DBH	stand density	dominant species
1	0.08	88	10.5	24.4	12.5	110
2	0.08	53.125	16.1	25.8	12.5	110
3	0.0667	85.4573	15.4	26.7	14.9925	110
4	0.08	86.05	19	31.5	12.5	110
5	0.08	61.9375	17.2	35.5	12.5	110
6	0.08	19.0375	9.8	9.38649	462.5	110
7	0.0667	16.3268	8	10.1333	404.798	110
8	0.0667	55.5022	15.7	16.9333	179.91	110
9	0.0667	32.3688	11.2	13.0954	329.835	110
10	0.0667	74.5127	10.2	12.65	449.775	110
11	0.08	62.325	12.7	13.7707	512.5	110
12	0.0667	220.045	4.3	9.16813	1364.32	110
13	0.0667	122.534	1.5	24.1	209.895	110
14	0.08	113.537	18	22.16	250	110
15	0.0667	126.087	12.6	21.9765	254.873	110
16	0.0667	94.6327	12.9	16.5484	464.768	110
17	0.0667	84.4378	12.1	16.7613	464.768	110
18	0.0667	125.442	26.8	46.8	59.97	110
19	0.0667	224.603	12.1	24.2667	224.888	110
20	0.0667	190.69	16	19.2231	389.805	110
21	0.08	174.225	11.3	14.2982	712.5	110
22	0.08	135.537	15.5	15.4367	612.5	110
23	0.0667	201.499	23.9	31.0273	164.918	110
24	0.0667	143.523	10	26.9875	239.88	110
25	0.0667	239.775	15	62.7	44.9775	110
26	0.08	99.275	9.2	13.1988	1025	110
27	0.08	160.625	11	15.8797	737.5	110
28	0.0667	217.616	21	50	74.9625	110
29	0.08	162.45	14.2	18.2733	562.5	110
30	0.0667	251.889	14.7	25.395	299.85	110
31	0.08	115.7	12.2	11.1423	1625	110
32	0.08	178.537	18.3	15.7615	812.5	110
33	0.0667	188.711	19.2	67.1333	44.9775	110
34	0.0667	282.399	22.6	35.1091	164.918	110
35	0.08	135.962	7.2	14.8	962.5	110
36	0.0667	209.19	14.1	24.3708	359.82	110
37	0.0667	299.52	22.8	34.6417	179.91	110
38	0.0667	299.52	22.8	34.6417	179.91	110
39	0.0667	302.969	19.5	25.2652	344.828	110
40	0.0667	313.283	20.9	22.9179	419.79	110
41	0.0667	246.462	16	21.6531	479.76	110
42	0.0667	210.855	20.5	30.9125	239.88	110
43	0.0667	292.624	23.3	30.1882	254.873	110
44	0.0667	330.495	20.9	26.2826	344.828	110
45	0.08	206.562	18	30.2905	262.5	110
46	0.0667	415.052	20.6	22.1088	509.745	110
47	0.0667	359.91	24	33.44	224.888	110
48	0.0667	287.031	11.2	22.1444	539.73	110
49	0.0667	238.636	20	42.48	149.925	110
50	0.0667	297.691	15.2	21.605	599.7	110
51	0.0667	210.93	20.5	22.25	569.715	110
52	0.0667	248.411	22	30	314.843	110
53	0.08	305.325	26.9	39.6467	187.5	110
54	0.08	208.325	8.5	17.5974	962.5	110
55	0.0667	252.624	18.9	25.8433	449.775	110
56	0.0667	395.232	13.6	30.9773	329.835	110
57	0.0667	450.36	24.6	33.3684	284.858	110
58	0.0667	450.36	24.6	33.3684	284.858	110
59	0.08	275	18.2	28.4031	400	110
60	0.08	360.2	23.9	33.1625	300	110
61	0.08	269.35	19.3	20.8213	762.5	110
62	0.0667	491.409	25	33.0619	314.843	110
63	0.0667	309.085	18	31	359.82	110
64	0.0667	426.867	22.7	41.2929	209.895	110
65	0.08	327.175	20.7	22.479	712.5	110
66	0.0667	404.303	22.8	58.6429	104.948	110
67	0.0667	424.408	21.7	29.4607	419.79	110
68	0.08	312.025	18.7	19.4	1000	110
69	0.0667	671.514	24.3	27.1765	509.745	110
70	0.0667	376.732	23.3	27.2088	509.745	110
71	0.0667	418.486	18	29.7897	434.783	110
72	0.0667	774.558	22.2	28.303	494.753	110
73	0.08	368.65	23.3	34.5852	337.5	110
74	0.08	421.9	23.4	27.4273	550	110
75	0.0667	482.339	18.7	23.5528	794.603	110
76	0.0667	668.441	29.8	41.1556	269.865	110
77	0.0667	539.64	28	50.6333	179.91	110
78	0.0667	661.844	14.1	28.729	569.715	110
79	0.0667	691.949	13.9	23.1387	929.535	110
80	0.0667	731.334	26.8	32.7968	464.768	110
81	0.0667	576.492	25.9	34.5786	419.79	110
82	0.08	382.425	13.8	19.2321	1362.5	110
83	0.0667	571.859	17.7	31.1944	539.73	110
84	0.08	540.95	24.1	24.1507	912.5	110
85	0.0667	698.681	31.2	37.0481	404.798	110
86	0.08	517.825	22.5	37.2206	425	110
87	0.0667	891.739	22.2	36.9667	494.753	110
88	0.0667	869.07	28.3	31.5894	704.648	110
89	0.0667	1142.61	23.1	38.6235	509.745	110
90	0.0667	827.346	21.5	56.9813	239.88	110
91	0.0667	619.49	24	50	299.85	130
92	0.0667	798.966	29	56.3842	284.858	130
93	0.0667	79.4603	16.4	33.7	14.9925	130
94	0.0667	89.955	13	20	14.9925	130
95	0.0667	259.37	20.2	32.6	14.9925	130
96	0.0667	434.783	20	39	14.9925	130
97	0.08	77.0375	6.6	28.0083	150	130
98	0.08	92.1625	11.3	20.4182	275	130
99	0.0667	91.5142	13.5	18.7909	329.835	140
100	0.0667	20.6597	4.3	8.25593	884.558	140
101	0.0667	25.0075	8.9	17.5	149.925	140
102	0.0667	29.6552	6.9	14.065	299.85	140
103	0.0667	60.5247	8.4	12.0961	1169.42	140
104	0.0667	61.5142	7	11.0488	1259.37	140
105	0.0667	64.033	6.1	12.3167	989.505	140
106	0.0667	66.7766	4.3	8.27927	2893.55	140
107	0.0667	68.8156	6.5	14.2136	884.558	140
108	0.0667	84.7226	6	12.1851	1604.2	140
109	0.0667	87.8261	9.4	15.4796	734.633	140
110	0.0667	97.2264	8.2	15.1237	884.558	140
111	0.0667	45.4573	6.2	10.4329	1139.43	140
112	0.0667	83.958	12.5	18.5	14.9925	140
113	0.06	34.9	10	9.04394	1100	150
114	0.06	43.75	7	8.0386	1900	150
115	0.06	77.7833	8	10.1256	2016.67	150
116	0.06	81.6167	11	25.6067	250	150
117	0.06	123.483	16	22.9481	450	150
118	0.06	128.117	12.1	10.5064	2883.33	150
119	0.06	157.433	13.5	17.9875	1066.67	150
120	0.08	74.1	11	13.1117	750	150
121	0.08	91.0375	11	24.7059	212.5	150
122	0.08	102.638	12	10.6612	1675	150
123	0.08	112.25	14	16.3658	512.5	150
124	0.08	129.25	15	11.5688	1525	150
125	0.08	190.65	17	15.4692	1337.5	150
126	0.06	50.2333	9	8.96585	1366.67	150
127	0.06	69.8167	11	9.26	1750	150
128	0.06	76.2333	14	20.2133	250	150
129	0.06	99.3667	16	22.6313	266.667	150
130	0.06	126.1	13	11.4116	1716.67	150
131	0.06	158.167	23	13.6662	1233.33	150
132	0.06	165.633	14	11.5297	2133.33	150
133	0.06	172.583	19	19.6725	666.667	150
134	0.06	176.717	25	32.3846	216.667	150
135	0.06	184.35	32	42.6167	100	150
136	0.06	33.1333	8	8.50328	1016.67	150
137	0.06	44.2167	11	9.83684	950	150
138	0.06	60.1167	16	13.5375	400	150
139	0.06	62.3	13	11.8184	816.667	150
140	0.06	66	13	14.9548	516.667	150
141	0.06	76.1833	14	12.2592	816.667	150
142	0.06	83.3167	15	10.9648	1183.33	150
143	0.06	84.0667	17	15.925	600	150
144	0.06	91.5167	12	9.01348	2350	150
145	0.06	92	14	15.571	633.333	150
146	0.06	96.05	11	11.6416	1283.33	150
147	0.06	108.933	10	11.0745	1633.33	150
148	0.06	121.683	22	25.1588	283.333	150
149	0.06	207.333	13	10.4855	3550	150
150	0.06	59.7333	9	12.6841	733.333	150
151	0.06	35.9833	8.6	8.34225	1183.33	150
152	0.06	38.5833	10.2	7.67671	1216.67	150
153	0.06	39.3333	17.1	21.3667	100	150
154	0.06	42.35	11.7	10.9964	466.667	150
155	0.06	43.5	15.9	17.15	233.333	150
156	0.06	48.2833	13.3	11.9265	566.667	150
157	0.06	52.4167	10.4	11.0957	783.333	150
158	0.06	53.9333	13.2	10.5233	716.667	150
159	0.06	54.7167	14.6	13.0452	516.667	150
160	0.06	56.35	7.2	7.85802	2183.33	150
161	0.06	60.6333	12.2	14.6963	450	150
162	0.06	60.85	17.7	18.8545	183.333	150
163	0.06	64.4	11.9	7.8252	2116.67	150
164	0.06	73.1833	8.9	8.04414	2416.67	150
165	0.06	76.3167	14	13.9812	533.333	150
166	0.06	81.4667	19.8	16.74	333.333	150
167	0.06	81.9333	10.4	8.26322	1450	150
168	0.06	85.3167	15.2	19.2706	283.333	150
169	0.06	88	10.9	8.61912	2266.67	150
170	0.06	89.1667	19	15.75	500	150
171	0.06	92.65	12.7	12.0427	1133.33	150
172	0.06	94.35	13.4	11.3048	1050	150
173	0.06	94.4	9.5	12.2	900	150
174	0.06	98.7333	12.4	9.90417	2000	150
175	0.06	104.45	18.2	20.05	400	150
176	0.06	118.283	15.7	14.3	850	150
177	0.06	118.817	14	11.049	1733.33	150
178	0.06	122.567	17.1	19.8185	450	150
179	0.06	124.133	11.9	12.2759	966.667	150
180	0.06	132.783	12.5	8.70311	3750	150
181	0.06	134.033	16.2	14.5373	850	150
182	0.06	138.617	17.1	14.5569	1083.33	150
183	0.06	149.533	17.2	17.6158	633.333	150
184	0.06	170.217	14.1	14.5925	1116.67	150
185	0.06	173.05	14	11.9246	2166.67	150
186	0.06	176.717	15.3	11.9792	2083.33	150
187	0.06	53.7833	11.7	9.69355	1033.33	150
188	0.06	62.2833	14.8	13.3806	600	150
189	0.06	86.6833	15.2	13.5279	716.667	150
190	0.06	98.5167	17.1	17.4421	316.667	150
191	0.06	158.35	20.5	15.6667	550	150
192	0.0667	60.1499	10.8	13.0179	1004.5	150
193	0.0667	58.8756	10.3	10.7959	1109.45	150
194	0.06	45.8333	12.1	16.21	333.333	150
195	0.06	72.85	12.3	13.2089	750	150
196	0.06	110.417	17.1	16.1475	666.667	150
197	0.06	148.917	13.4	11.7615	2033.33	150
198	0.06	188.917	19.1	31.4933	250	150
199	0.06	201.833	22.8	25.8037	450	150
200	0.0667	315.877	18.6	32.3654	389.805	150
201	0.06	35.6833	12.3	11.4125	400	150
202	0.06	64.65	9	9.72885	1733.33	150
203	0.06	70.0667	10.5	10.1857	1633.33	150
204	0.06	73.4333	12.7	11.6286	700	150
205	0.06	84.3833	15.4	14.8542	800	150
206	0.06	87.6167	11.3	11.1082	1633.33	150
207	0.06	92.9167	13.2	18.3353	566.667	150
208	0.06	97.9833	19.3	29.2923	216.667	150
209	0.06	104.917	11.5	15.4306	816.667	150
210	0.06	130.783	15.3	15.7766	1066.67	150
211	0.06	143.283	16.2	13.7919	1433.33	150
212	0.06	151.3	14.8	14.3628	1433.33	150
213	0.06	171.55	18.8	25.5125	400	150
214	0.0667	32.054	9.5	10.1413	944.528	150
215	0.0667	33.2234	5.8	8.38972	1604.2	150
216	0.0667	35.907	10.5	14.8923	389.805	150
217	0.0667	39.2804	12.3	13.7719	479.76	150
218	0.0667	40.4198	8.3	8.84071	1694.15	150
219	0.0667	43.1334	7.8	8.35986	2203.9	150
220	0.0667	53.2534	9.5	11.3444	944.528	150
221	0.0667	64.093	7.6	10.3591	1724.14	150
222	0.0667	122.864	12.3	13.5785	1604.2	150
223	0.0667	126.372	11.1	13.5222	1619.19	150
224	0.0667	150.705	17.2	33.2643	209.895	150
225	0.0667	232.444	14	13.1656	3448.28	150
226	0.06	33.0667	9.9	8.02917	1200	150
227	0.06	33.5167	15.2	14.2615	216.667	150
228	0.06	34.3833	14.4	17.4273	183.333	150
229	0.06	36.0167	13.7	12.105	333.333	150
230	0.06	41.9	12.3	9.56429	933.333	150
231	0.06	45.2	8.6	8.54725	1516.67	150
232	0.06	45.7	10.3	8.74565	1533.33	150
233	0.06	50.1167	16.8	32.975	66.6667	150
234	0.06	50.1333	14.1	13.5207	483.333	150
235	0.06	50.5667	12	10.732	833.333	150
236	0.06	51.3833	8.5	8.39358	1816.67	150
237	0.06	52.4333	8.8	10.9475	666.667	150
238	0.06	54.7	13.5	13.5375	400	150
239	0.06	55.7667	13.3	13.2781	533.333	150
240	0.06	57.4	12.5	9.97808	1216.67	150
241	0.06	58.8167	10.7	11.7293	683.333	150
242	0.06	62.2167	8.6	10.4472	883.333	150
243	0.06	62.7833	16	13.9857	466.667	150
244	0.06	63.5667	11.4	11.2654	916.667	150
245	0.06	66.5667	10.2	10.702	833.333	150
246	0.06	66.6333	20.7	31.2167	100	150
247	0.06	68.6167	16.3	17.1524	350	150
248	0.06	70.6	11.5	9.39326	1483.33	150
249	0.06	70.7167	12.7	10.132	1250	150
250	0.06	71.6667	16	12.4825	666.667	150
251	0.06	71.8833	9.4	10.7947	1266.67	150
252	0.06	74.6167	12	13.5316	633.333	150
253	0.06	74.7	10.8	11.1622	616.667	150
254	0.06	75.3667	14.7	15.2454	366.667	150
255	0.06	77.3	14.2	13.6837	816.667	150
256	0.06	80.1333	13.2	10.9653	1200	150
257	0.06	80.6333	25.9	19.4267	250	150
258	0.06	81.5833	21.1	14.675	333.333	150
259	0.06	82.55	15.3	13.6692	650	150
260	0.06	84.9833	10.7	11.4642	883.333	150
261	0.06	86.6667	15.9	13.8946	616.667	150
262	0.06	87.2667	12.2	9.93529	1416.67	150
263	0.06	93.5667	11.4	10.4369	1400	150
264	0.06	94.1167	13.7	15.5967	500	150
265	0.06	96.9833	14.3	11.4948	966.667	150
266	0.06	97.7733	12.8	19.0191	700	150
267	0.06	98.7667	20.1	16.5296	450	150
268	0.06	100.117	13.6	19.6389	300	150
269	0.06	104.35	15.1	12.9946	933.333	150
270	0.06	108.9	17.6	17.9379	483.333	150
271	0.06	113.4	11.6	8.98	2833.33	150
272	0.06	113.65	10.7	11.905	1650	150
273	0.06	115.217	17.2	22.7	316.667	150
274	0.06	115.817	17.8	19.4286	350	150
275	0.06	116.017	16.8	25.5539	216.667	150
276	0.06	116.467	13.1	11.42	1333.33	150
277	0.06	118.083	12.1	11.1394	1183.33	150
278	0.06	118.25	14.3	12.352	1283.33	150
279	0.06	125.483	18.6	16.1571	583.333	150
280	0.06	125.667	16	19.2696	383.333	150
281	0.06	129.217	12.8	15.6698	716.667	150
282	0.06	140.7	13.7	12.8339	933.333	150
283	0.06	141.567	17.2	19.4969	533.333	150
284	0.06	142.933	16	14.1261	1150	150
285	0.06	143.317	14.6	17.84	500	150
286	0.06	145.083	19.3	16.3667	700	150
287	0.06	156.067	21.5	22.632	416.667	150
288	0.06	157.6	15.6	12.141	1666.67	150
289	0.06	158.183	21.1	18.4775	666.667	150
290	0.06	168	15.1	19.4297	616.667	150
291	0.06	169.65	19.2	22.5129	516.667	150
292	0.06	180.083	19.2	18.2645	516.667	150
293	0.06	185.367	26	36.8454	183.333	150
294	0.06	189.283	13.7	15.1724	966.667	150
295	0.06	198.817	21.1	19.9273	550	150
296	0.06	211.15	16.8	15.3965	966.667	150
297	0.06	213.917	17.3	20.1465	716.667	150
298	0.0667	38.2609	7.5	14.8191	314.843	150
299	0.0667	68.3958	11.2	15.127	554.723	150
300	0.0667	83.0135	18.3	36.98	74.9625	150
301	0.0667	126.897	19.7	40.4875	119.94	150
302	0.0667	129.715	17.9	29.0077	194.903	150
303	0.0667	152.564	18.4	22.4972	539.73	150
304	0.0667	155.892	13.5	21.7691	629.685	150
305	0.0667	159.205	11.9	24.9292	359.82	150
306	0.0667	185.712	19.8	26.6278	269.865	150
307	0.0667	217.736	17.6	45.32	149.925	150
308	0.0667	218.411	17.4	35.0375	239.88	150
309	0.08	32.9875	7.1	10.904	625	150
310	0.08	45.375	16.2	14.9548	387.5	150
311	0.06	34.8	7.6	11.5587	766.667	150
312	0.06	36.55	9.6	9.65263	1266.67	150
313	0.06	36.7833	7.6	8.79286	1633.33	150
314	0.06	42.6333	10.1	11.904	833.333	150
315	0.06	42.9333	14	16.392	416.667	150
316	0.06	48.0333	12.4	10.8266	1316.67	150
317	0.06	57.1333	10	11.8177	1133.33	150
318	0.06	74.9	14.7	20.2808	433.333	150
319	0.06	90.7667	13	11.1023	2216.67	150
320	0.06	99.4167	13.8	14.2848	1316.67	150
321	0.06	152.567	19.6	17.9088	1133.33	150
322	0.06	168.633	19	23.0489	750	150
323	0.08	30.75	15.2	17.75	150	150
324	0.08	41.9	8	19.2923	162.5	150
325	0.08	52.4875	22.9	37.975	50	150
326	0.08	54.075	11	18.56	187.5	150
327	0.08	59.525	20	26.6857	87.5	150
328	0.08	67.45	18.6	16.2269	325	150
329	0.08	67.8	13.2	15.05	475	150
330	0.08	69.625	12.5	29.4429	87.5	150
331	0.08	75.025	14.8	16.3531	400	150
332	0.08	80	9.8	22.3	12.5	150
333	0.08	81.675	7.6	13.5584	962.5	150
334	0.08	87.25	11.8	19.5769	325	150
335	0.08	87.575	1.9	24.9312	200	150
336	0.08	88.9875	16.6	18.5037	337.5	150
337	0.08	93.8875	13.3	12.5877	712.5	150
338	0.08	102.75	12.6	23.09	250	150
339	0.08	104.6	14.8	19.172	312.5	150
340	0.08	104.838	16.3	14.8714	525	150
341	0.08	106.188	17	14.6609	862.5	150
342	0.08	107.438	15.5	14.3	600	150
343	0.08	109.7	16.7	20.1069	362.5	150
344	0.08	111.025	17.1	21.0586	362.5	150
345	0.08	112.125	23	32.7636	137.5	150
346	0.08	112.75	16.4	29.5	12.5	150
347	0.08	112.862	13	18.4739	287.5	150
348	0.08	113.588	20.5	26.5111	225	150
349	0.08	117	20.3	17.0967	375	150
350	0.08	120.15	15.7	26.62	187.5	150
351	0.08	121.9	16.3	20.1879	412.5	150
352	0.08	123.975	15.9	15.8265	612.5	150
353	0.08	125.9	17.1	20.2217	287.5	150
354	0.08	126.225	10.6	11.0803	1775	150
355	0.08	132.037	17.7	20.5029	425	150
356	0.08	132.512	16.4	14.3194	900	150
357	0.08	132.875	16.7	26.5	250	150
358	0.08	137.287	23.3	20.1833	450	150
359	0.08	137.9	19.1	26.7053	237.5	150
360	0.08	139.637	8.3	12.8353	1487.5	150
361	0.08	140.025	18	24.2304	287.5	150
362	0.08	141.65	22.6	28.575	200	150
363	0.08	142.762	21	32.2	12.5	150
364	0.08	144.237	17.5	14.9107	937.5	150
365	0.08	148.612	14.1	16.1893	700	150
366	0.08	152.637	16.4	64.325	50	150
367	0.08	155.625	21	29	12.5	150
368	0.08	155.8	22.6	37.1692	162.5	150
369	0.08	156.5	16.9	26.7	12.5	150
370	0.08	156.5	21.8	27.5	12.5	150
371	0.08	157.438	18	16.3194	775	150
372	0.08	159.787	24.4	48.0833	75	150
373	0.08	161.838	27.1	25.7577	325	150
374	0.08	162.2	19.4	18.6426	675	150
375	0.08	167.912	17.1	16.9535	887.5	150
376	0.08	169.637	17.3	57	62.5	150
377	0.08	175.713	20.3	20.9034	362.5	150
378	0.08	175.8	21.5	32.02	187.5	150
379	0.08	182.225	22.5	30.14	187.5	150
380	0.08	189.025	16	18.9365	787.5	150
381	0.08	190.175	17.5	13.7302	1700	150
382	0.08	191.5	19.7	15.306	1037.5	150
383	0.08	191.812	28.2	29.1375	200	150
384	0.08	191.887	27.5	24.8733	375	150
385	0.08	194.212	15.5	15.6989	1150	150
386	0.08	197.75	23	26.6667	375	150
387	0.08	198.6	26.6	40.1846	162.5	150
388	0.08	203.3	29	85.2667	37.5	150
389	0.08	204.113	18.1	14.9482	1037.5	150
390	0.08	205.45	15	17.8558	962.5	150
391	0.08	205.975	17.5	14.3429	1050	150
392	0.08	214.213	15.9	21.0116	537.5	150
393	0.08	215.137	18.2	27.1125	400	150
394	0.08	220.05	17.8	16.8173	1012.5	150
395	0.08	220.75	18.7	22.71	625	150
396	0.08	222.75	13.5	13.4848	987.5	150
397	0.08	223.337	28.5	39	187.5	150
398	0.08	231.312	20.5	16.8939	812.5	150
399	0.08	231.512	22.3	31.0191	262.5	150
400	0.08	232.712	24.2	34.9118	212.5	150
401	0.08	232.862	36	55.3625	100	150
402	0.08	234.4	23.5	38.4177	212.5	150
403	0.08	241.5	17.3	17.5271	1062.5	150
404	0.08	245.662	25	51.1667	112.5	150
405	0.08	245.825	20.6	26.5556	450	150
406	0.08	250.25	24.3	26.2475	500	150
407	0.08	255.737	22.6	19.0742	775	150
408	0.08	255.825	20.7	45.0692	162.5	150
409	0.08	258.125	21	28.4	412.5	150
410	0.08	263.375	19.5	18.2625	900	150
411	0.08	268.787	19.2	30.0412	425	150
412	0.08	269.05	20.6	17.9427	937.5	150
413	0.08	273.8	26.2	53.52	125	150
414	0.08	275.887	18.1	15.8048	1037.5	150
415	0.08	282.562	29	54.48	125	150
416	0.08	284.35	18.1	26.3441	425	150
417	0.08	285.25	23.8	33.9519	337.5	150
418	0.08	287.412	14.2	18.1919	925	150
419	0.08	294.05	27.8	31.2333	375	150
420	0.08	300.825	19.3	22.2741	725	150
421	0.08	324.5	26.2	47.22	187.5	150
422	0.08	324.925	17	19.4323	850	150
423	0.08	325.75	20.1	27.2595	525	150
424	0.08	331.025	14.3	16.3331	1962.5	150
425	0.08	347.762	28	52.7462	162.5	150
426	0.08	355.637	25.5	23.0594	800	150
427	0.08	366.525	19.1	20.5746	887.5	150
428	0.08	367.45	21.5	21.2314	875	150
429	0.08	378.038	32.1	42.6571	262.5	150
430	0.08	382.337	29.2	46.225	200	150
431	0.08	388.525	22.6	29.9757	462.5	150
432	0.08	388.912	16.2	31.1195	512.5	150
433	0.08	394.725	24.6	26.2385	650	150
434	0.08	408.812	24	24.9333	787.5	150
435	0.08	437.637	27.3	45.565	250	150
436	0.08	441.688	28.3	27.4098	637.5	150
437	0.08	442.238	24.7	37.3567	375	150
438	0.08	450.962	16.1	54.2938	200	150
439	0.08	511.125	26.2	42.1885	325	150
440	0.08	38.1875	11	12.6718	487.5	160
441	0.08	47.8	6	7.89016	2287.5	160
442	0.08	85.8	9	10.3662	1812.5	160
443	0.08	145.962	14	24.3857	350	160
444	0.06	319.867	21	18.9612	1116.67	160
445	0.06	141.7	22	37.075	133.333	160
446	0.06	46.3833	12	10.9915	783.333	160
447	0.06	153.167	18.7	50	66.6667	160
448	0.06	66.7	12.9	18.0636	550	160
449	0.06	236.933	30	80.15	33.3333	160
450	0.08	25.4375	6	9.22703	925	170
451	0.08	76.7625	9	15.7182	825	170
452	0.06	42.9	15.1	16.6636	183.333	170
453	0.06	73.3	14	16.6696	383.333	170
454	0.06	39.65	10.2	24.0333	150	170
455	0.06	76.95	12.6	22.8045	366.667	170
456	0.06	101.833	10.8	13.688	1533.33	170
457	0.06	121.85	11.9	14.6462	1550	170
458	0.06	125.417	9.8	12.405	2350	170
459	0.06	24.9167	6.7	13.2	433.333	170
460	0.06	91.6	16.1	36.8875	133.333	170
461	0.06	92.5667	11.7	17.9409	733.333	170
462	0.06	108.05	12.5	18.875	533.333	170
463	0.06	113.833	14	10.7514	1850	170
464	0.06	231.617	21.8	29.2556	600	170
465	0.06	240.95	22.4	26.0286	350	170
466	0.08	37.5	10	20	12.5	170
467	0.06	61.9333	12	12.4833	800	180
468	0.0667	0.974513	4.5	6.91667	89.955	180
469	0.0667	1.30435	2.5	6.73333	134.933	180
470	0.0667	2.89355	2.6	6.4	329.835	180
471	0.0667	3.71814	3.3	7.64706	254.873	180
472	0.0667	7.34633	3.7	8.18889	404.798	180
473	0.0667	10.2699	5.9	10.5191	314.843	180
474	0.0667	10.3898	4	11.3529	254.873	180
475	0.0667	11.0345	3.6	7.14219	959.52	180
476	0.0667	16.2969	5.8	7.21889	1349.33	180
477	0.0667	22.6087	3.6	9.1873	944.528	180
478	0.0667	38.7406	8.4	11.8089	839.58	180
479	0.0667	40.9445	8.1	16.688	374.813	180
480	0.0667	46.1919	7.1	10.0409	1394.3	180
481	0.06	54.15	13	15.2852	450	190
482	0.06	57.25	10	15.0742	516.667	190
483	0.06	150.85	12	15.5744	1300	190
484	0.0667	18.8756	5.1	10.6974	569.715	190
485	0.0667	0.524738	2.2	6.375	59.97	190
486	0.0667	13.8081	5.1	8.02264	794.603	190
487	0.0667	16.9115	8.1	11.4783	344.828	190
488	0.0667	26.8816	6.3	12.1886	524.738	190
489	0.0667	29.0405	6.5	9.14429	1049.48	190
490	0.0667	37.5712	4.6	9.4102	1469.27	190
491	0.0667	38.2759	4.8	9.51548	1259.37	190
492	0.0667	39.4003	7.1	11.1844	959.52	190
493	0.0667	57.6012	7.2	11.0032	1409.3	190
494	0.0667	65.6672	5.6	10.0748	2023.99	190
495	0.0667	66.2969	7.6	9.58148	2023.99	190
496	0.0667	83.958	6.1	13.0864	1319.34	190
497	0.0667	110.435	8.8	16.8673	824.588	190
498	0.0667	2.47376	2.9	8.97143	104.948	200
499	0.0667	4.87256	3.9	9.08	224.888	200
500	0.0667	11.2594	3.3	8.51579	569.715	200
501	0.0667	16.7016	6.5	10.7903	464.768	200
502	0.0667	20.6147	6	13.6905	314.843	200
503	0.0667	21.8441	4.5	9.5	854.573	200
504	0.0667	23.913	4.8	12.7593	404.798	200
505	0.0667	25.0375	5.6	12.8963	404.798	200
506	0.0667	26.7616	6.8	10.6438	719.64	200
507	0.0667	32.5637	6.4	15.1074	404.798	200
508	0.0667	39.91	7	11.8691	824.588	200
509	0.0667	42.8036	6.3	9.53462	1559.22	200
510	0.0667	59.0105	12.3	11.3398	1394.3	200
511	0.0667	60.015	9.7	14.8654	779.61	200
512	0.0667	67.6762	7	12.0736	1364.32	200
513	0.0667	68.2459	7.5	16.2298	704.648	200
514	0.0667	78.8156	11	15.0887	929.535	200
515	0.0667	84.4828	8.7	16.98	824.588	200
516	0.0667	121.994	13.3	13.6602	1844.08	200
517	0.0667	127.091	15.7	15.0191	1409.3	200
518	0.0667	197.136	13	20.0467	1379.31	200
519	0.06	9.91667	6	7.05135	616.667	200
520	0.06	10.6667	5.8	8.44074	450	200
521	0.06	12.9167	4	9.03704	450	200
522	0.06	13.5833	5.5	9.4375	400	200
523	0.06	14.7667	5	7.85	700	200
524	0.06	17.2833	5.8	8.24762	700	200
525	0.06	19.2833	6.3	12.6	283.333	200
526	0.06	21.2333	7.3	8.16909	916.667	200
527	0.06	25.3333	4.6	10.4	500	200
528	0.06	27.2167	7.1	7.856	1250	200
529	0.06	29.4	7.5	11.8233	500	200
530	0.06	30.3167	8.9	15.9917	200	200
531	0.06	32.7	6.2	8.64789	1183.33	200
532	0.06	38.4333	8.1	11.8868	633.333	200
533	0.06	43.8667	7	13.1844	533.333	200
534	0.06	45.5167	7	8.77423	1616.67	200
535	0.06	46.1167	9	14.0645	516.667	200
536	0.06	48.3667	6	12.4349	716.667	200
537	0.06	49.4167	6.5	8.42564	1950	200
538	0.06	51.5167	5.8	9.1	1500	200
539	0.06	60.2333	7.5	12.4857	816.667	200
540	0.06	60.5	5	9.67188	1600	200
541	0.06	61.45	7.2	11.1145	1150	200
542	0.06	64.7333	7	10.4768	1366.67	200
543	0.06	66.2333	7.2	10.178	1516.67	200
544	0.06	66.35	8.7	15.0314	583.333	200
545	0.06	68.0167	9.5	9.78411	1783.33	200
546	0.06	69.5333	8.8	11.6594	1150	200
547	0.06	70.85	7	8.34261	2933.33	200
548	0.06	78.8333	7	11.3425	1450	200
549	0.06	79.1167	11	10.2874	1583.33	200
550	0.06	79.3833	7	13.4365	866.667	200
551	0.06	79.5667	9	16.7778	600	200
552	0.06	81.6167	4.5	8.15869	3550	200
553	0.06	86.0167	8.5	13.6746	983.333	200
554	0.06	88.6667	8	15.9452	700	200
555	0.06	91.8167	8	12.2598	1366.67	200
556	0.06	119.1	11	14.35	1166.67	200
557	0.06	120.817	12	18.2021	783.333	200
558	0.08	5.7375	4	7.14595	462.5	200
559	0.08	7.3375	3	7.57027	462.5	200
560	0.08	13.2125	5	7.24615	975	200
561	0.08	14.4	5	8.21754	712.5	200
562	0.08	25.2	6	10.75	625	200
563	0.08	25.3625	7	11.6794	425	200
564	0.08	25.8	8	12.2375	400	200
565	0.08	33.075	5	9.21395	1075	200
566	0.08	39.6875	8	11.5017	737.5	200
567	0.08	41.2	6	9.34087	1437.5	200
568	0.08	43.125	7	13.4721	537.5	200
569	0.08	55.3875	8	10.8132	1137.5	200
570	0.08	84.4125	10	12.2638	1312.5	200
571	0.08	113.013	10	13.2213	1350	200
572	0.08	119.088	10	13.1718	1550	200
573	0.08	138.325	13	20.6133	562.5	200
574	0.08	183.775	11	14.4007	1687.5	200
575	0.08	190.05	16	18.5482	1037.5	200
576	0.0667	21.949	7.4	17.6546	164.918	200
577	0.0667	44.2879	8.7	14.9313	479.76	200
578	0.08	14.9125	6.6	11.069	362.5	200
579	0.08	54.3625	10.4	13.5559	737.5	200
580	0.08	66.55	8	13.2637	1000	200
581	0.08	143.7	12	11.3526	2875	200
582	0.0667	6.68366	4.4	6.92424	494.753	200
583	0.0667	7.6012	5.3	10.6882	254.873	200
584	0.0667	9.10045	10.3	18.025	59.97	200
585	0.0667	12.099	5.3	7.82857	734.633	200
586	0.0667	13.2234	5	9.00732	614.693	200
587	0.0667	13.6582	7	13.0125	239.88	200
588	0.0667	14.8276	4.6	10.7438	479.76	200
589	0.0667	15.2924	6.8	9.425	659.67	200
590	0.0667	15.4123	4.5	10.2972	539.73	200
591	0.0667	15.5772	5.6	15.1231	194.903	200
592	0.0667	17.8261	7.2	10.9931	434.783	200
593	0.0667	19.8051	5.2	7.3466	1544.23	200
594	0.0667	19.97	5.5	7.54	1499.25	200
595	0.0667	21.964	8.7	12.4774	464.768	200
596	0.0667	22.1589	7.5	14.012	374.813	200
597	0.0667	22.7586	8.5	13.6536	419.79	200
598	0.0667	22.9835	4.3	8.8	1154.42	200
599	0.0667	23.5982	5.4	10.45	599.7	200
600	0.0667	25.0975	16.4	23.9333	89.955	200
601	0.0667	25.2474	5.5	8.34141	1484.26	200
602	0.0667	26.1169	7.2	10.594	749.625	200
603	0.0667	29.2354	11.3	21.3	134.933	200
604	0.0667	29.5652	5.2	8.052	1874.06	200
605	0.0667	31.6042	7.5	18.195	299.85	200
606	0.0667	33.8231	6	15.2063	479.76	200
607	0.0667	34.4228	5.8	11.8767	899.55	200
608	0.0667	34.9925	5.6	9.00862	1739.13	200
609	0.0667	35.2624	5.6	14.8241	434.783	200
610	0.0667	37.1364	11.8	27.125	119.94	200
611	0.0667	37.1514	5.7	12.9273	659.67	200
612	0.0667	38.3358	5.8	9.82653	1469.27	200
613	0.0667	39.1454	5.7	10.6786	1049.48	200
614	0.0667	40.8096	6.6	18.25	419.79	200
615	0.0667	41.0795	10.5	19.8217	344.828	200
616	0.0667	41.1244	7	13.8975	599.7	200
617	0.0667	41.3943	6.2	9.16829	1844.08	200
618	0.0667	44.2429	7.9	11.5529	1049.48	200
619	0.0667	45.5322	10	17.3227	329.835	200
620	0.0667	46.1769	5.9	18.0375	359.82	200
621	0.0667	46.5817	9.5	14.4073	614.693	200
622	0.0667	46.9865	7.2	12.0216	764.618	200
623	0.0667	47.8861	10.5	15.2611	539.73	200
624	0.0667	48.8606	7.2	12.5365	944.528	200
625	0.0667	49.4903	6.6	11.6171	1049.48	200
626	0.0667	53.988	7.3	14.9472	539.73	200
627	0.0667	55.3973	5.4	9.68831	2308.85	200
628	0.0667	55.6072	6.7	14.5556	539.73	200
629	0.0667	58.6957	8	13.0649	1109.45	200
630	0.0667	59.7901	7.9	16.2265	509.745	200
631	0.0667	59.97	10.6	16.68	449.775	200
632	0.0667	59.985	8.7	11.8	1514.24	200
633	0.0667	61.3493	6.1	11.606	1244.38	200
634	0.0667	62.3538	19	31.5	134.933	200
635	0.0667	67.2714	7.1	11.2865	1559.22	200
636	0.0667	69.0705	7.7	11.5062	1919.04	200
637	0.0667	70.7796	10.9	14.8853	1124.44	200
638	0.0667	72.3988	9.2	8.76473	3613.19	200
639	0.0667	73.2624	6.7	11.5	14.9925	200
640	0.0667	75.907	9.2	11.1333	2113.94	200
641	0.0667	77.8411	6.7	8.4017	4407.8	200
642	0.0667	79.4303	13.3	29.5267	224.888	200
643	0.0667	83.5082	12.4	18.1714	524.738	200
644	0.0667	87.946	9.9	14.6779	1019.49	200
645	0.0667	91.0795	9.5	14.6222	1079.46	200
646	0.0667	93.2384	8.3	13.7279	1184.41	200
647	0.0667	94.7676	7.6	12.4079	1709.15	200
648	0.0667	95.5472	6.7	10.6069	2623.69	200
649	0.0667	96.9265	13.9	27.7444	269.865	200
650	0.0667	107.421	11.7	17.375	959.52	200
651	0.0667	115.742	13.1	19.6673	779.61	200
652	0.0667	118.891	14.5	25.508	374.813	200
653	0.0667	126.117	9.9	19.6196	839.58	200
654	0.0667	134.288	12.2	17.079	1214.39	200
655	0.06	3.66667	4.4	6.78421	316.667	200
656	0.06	6.16667	4.1	7.73478	383.333	200
657	0.06	25.8167	5.8	9.75833	800	200
658	0.06	53.8167	5	9.20678	1966.67	200
659	0.06	126.217	13.2	22.4933	500	200
660	0.06	142.908	9	11.7445	2583.33	200
661	0.0667	13.928	6.2	9.2	419.79	200
662	0.0667	106.822	10.3	10.5407	1769.12	200
663	0.0667	167.091	13.4	16.8661	884.558	200
664	0.0667	248.081	18	26.0743	524.738	200
665	0.0667	258.546	33.5	43.5833	179.91	200
666	0.0667	262.369	16.2	26.2	14.9925	200
667	0.08	3.025	5.5	8.175	150	200
668	0.08	3.35	6	7.6625	200	200
669	0.08	6.5625	6.6	8.21111	337.5	200
670	0.08	11.2	4	7.87778	562.5	200
671	0.08	15.6125	7.1	10.7571	350	200
672	0.08	16.4	5.7	9.0449	612.5	200
673	0.08	17.9375	8	8.65079	787.5	200
674	0.08	18.1875	7	13.5238	262.5	200
675	0.08	19.2375	9	10.507	537.5	200
676	0.08	24.6	4.5	7.83153	1387.5	200
677	0.08	32.3125	5.2	7.49939	2050	200
678	0.08	37.2375	6.8	10.2795	1037.5	200
679	0.08	47.4125	8.8	13.4487	487.5	200
680	0.08	49.475	9.9	13.17	500	200
681	0.08	51.375	11.5	17.8185	337.5	200
682	0.08	51.6625	10.2	13.7244	562.5	200
683	0.08	51.7125	7.8	12.0924	825	200
684	0.08	65.4875	8.1	10.3984	1587.5	200
685	0.08	68.0625	7.2	11.9124	1212.5	200
686	0.08	71.0125	10.2	18.9167	375	200
687	0.08	105.537	11.4	16.7146	512.5	200
688	0.08	114.9	15.9	25.9739	287.5	200
689	0.08	118.4	11.7	18.8158	712.5	200
690	0.08	125	14.5	19	12.5	200
691	0.08	140.575	12.8	19.7453	662.5	200
692	0.08	156.412	12.3	18.2077	975	200
693	0.08	96.1375	15.8	31.2	12.5	200
694	0.08	101.037	15.9	29.4	12.5	200
695	0.08	18.8625	5	6.6046	1087.5	200
696	0.08	20.6625	7.7	9.77143	525	200
697	0.08	50.875	9.6	10.2021	1175	200
698	0.08	75	14.6	19.3	12.5	200
699	0.08	81.7625	7.7	11.2898	1475	200
700	0.08	94.95	19.3	26.4824	212.5	200
701	0.08	111.862	14.7	23.5067	375	200
702	0.08	125	17	20.7	12.5	200
703	0.08	139.363	15.7	16.05	875	200
704	0.08	206.025	18.4	20.4819	900	200
705	0.08	231.7	17.1	14.5843	1987.5	200
706	0.08	24.4125	6.6	9.11429	700	200
707	0.08	12.6875	8.5	9.11875	400	200
708	0.08	24.3625	5.2	6.7609	1662.5	200
709	0.08	39.7125	11.1	11.2385	650	200
710	0.08	41.7	13.7	15.5318	275	200
711	0.08	99.75	18.1	20.5857	350	200
712	0.08	101.25	14.6	24.5	12.5	200
713	0.08	106	13	14.8	12.5	200
714	0.08	112.513	8.8	13.4571	1050	200
715	0.08	115	16.9	16.2	12.5	200
716	0.08	118.75	18.9	20.4	12.5	200
717	0.08	125.262	14.8	14.7383	1012.5	200
718	0.08	140.713	13	16.2186	875	200
719	0.08	188.875	11.8	14.1	12.5	200
720	0.08	195.65	17	18.2153	900	200
721	0.08	216.275	15.2	14.5837	1762.5	200
722	0.06	6.23333	8	10.5	183.333	200
723	0.06	9.85	6	9.64211	316.667	200
724	0.06	36.6667	8.5	13	666.667	200
725	0.06	39.3167	10	17.4056	300	200
726	0.06	42.7333	11	15.8182	366.667	200
727	0.06	44.2333	7.4	14.8654	433.333	200
728	0.06	57.9833	11.2	18.3045	366.667	200
729	0.06	59.1667	8.1	18.581	350	200
730	0.06	60	8.5	16	666.667	200
731	0.06	73.05	12.4	21.081	350	200
732	0.06	79.7	11.1	20.75	366.667	200
733	0.06	81.8167	9.2	24.2053	316.667	200
734	0.06	90.5667	13.8	16.5093	716.667	200
735	0.06	117.083	10.5	13.8022	1500	200
736	0.06	124.5	10.5	13.9759	1450	200
737	0.06	135.53	10.2	25.632	416.667	200
738	0.06	135.6	14	16.0764	1200	200
739	0.06	188.983	12.6	16.7073	1600	200
740	0.0667	58.1259	8.2	9.43077	1559.22	200
741	0.0667	16.4918	6.7	10.6207	434.783	210
742	0.0667	24.4978	5.7	6.86174	2233.88	210
743	0.0667	31.5442	8.5	9.57778	1079.46	210
744	0.0667	42.2639	11.1	15.0071	419.79	210
745	0.0667	58.1709	5.4	9.36053	2278.86	210
746	0.0667	10.9145	4.2	6.98125	719.64	210
747	0.0667	21.0345	5.3	6.798	1499.25	210
748	0.0667	42.1589	6.6	10.0313	1004.5	210
749	0.0667	55.997	7.5	12.3915	884.558	210
750	0.0667	58.4258	6.8	11.1192	1169.42	210
751	0.0667	58.9955	8.1	19.9714	314.843	210
752	0.0667	63.1934	11.8	13.8806	464.768	210
753	0.0667	64.7076	8.6	17.0185	404.798	210
754	0.0667	78.6957	7.5	10.2413	1634.18	210
755	0.0667	87.901	9.3	7.47596	4677.66	210
756	0.0667	92.8786	12.4	14.125	1019.49	210
757	0.0667	98.2159	14.3	19.0059	509.745	210
758	0.0667	132.054	11.7	17.7574	914.543	210
759	0.0667	146.582	11	10.4891	3313.34	210
760	0.0667	186.657	12.3	13.7167	2338.83	210
761	0.0667	237.766	13.8	18.8852	1214.39	210
762	0.0667	55.4873	8.5	16.2297	554.723	210
763	0.0667	48.8006	12.8	16.0148	404.798	210
764	0.0667	52.6537	8.6	14.2171	524.738	210
765	0.0667	59.0405	8.1	15.875	479.76	210
766	0.0667	107.721	9.7	12.8	1364.32	210
767	0.0667	146.702	15.6	17.2636	989.505	210
768	0.08	25.075	10	11.0687	400	210
769	0.08	70.9375	9.1	13.0253	1037.5	210
770	0.08	72.4	17.2	18.8583	300	210
771	0.08	130	18.5	25.5	12.5	210
772	0.08	33.55	9.3	10.529	775	210
773	0.08	48.3625	12.5	27.9111	112.5	210
774	0.08	67.5	13.8	19.6	12.5	210
775	0.08	9.25	4.4	8.18378	462.5	210
776	0.08	33.65	5.6	9.01414	1237.5	210
777	0.06	31.8833	12	22.2556	150	210
778	0.0667	83.1034	10.5	15.4563	719.64	210
779	0.0667	89.7751	14.7	27.2929	209.895	210
780	0.08	1.6375	8.9	11.2	37.5	220
781	0.08	3.425	5.3	8.68333	150	220
782	0.08	6.7125	5.6	6.81698	662.5	220
783	0.08	7.15	9	7.14186	537.5	220
784	0.08	13.5875	3.6	7.32564	975	220
785	0.08	16.65	7.5	10.4097	387.5	220
786	0.08	17.075	5.8	8.35077	812.5	220
787	0.08	18.75	5.5	8.18354	987.5	220
788	0.08	21.575	5.2	7.69076	1487.5	220
789	0.08	27.4	9.2	10.7717	662.5	220
790	0.08	28.175	8.4	11.0647	637.5	220
791	0.08	31	9.2	15.2962	325	220
792	0.08	38.025	10.3	10.8988	1050	220
793	0.08	41.6875	11.4	14.9771	437.5	220
794	0.08	44.4	7	13.595	500	220
795	0.08	44.625	16.1	20.6438	200	220
796	0.08	45.05	7.4	10.2859	1237.5	220
797	0.08	45.925	7	9.26715	1712.5	220
798	0.08	61.7	8.2	12.0603	975	220
799	0.08	63.1375	13	23.075	200	220
800	0.08	70.7	8.5	10.5766	1712.5	220
801	0.08	107.625	12.1	23.7926	337.5	220
802	0.08	143.562	13	16.45	750	220
803	0.0667	8.36582	5.1	9.45	239.88	220
804	0.0667	20.8246	6.8	8.00723	1244.38	220
805	0.0667	20.9295	8.6	11.5821	419.79	220
806	0.0667	21.4843	5.1	8.6087	1034.48	220
807	0.0667	22.3688	8.9	10.1209	644.678	220
808	0.0667	23.0285	7	9.6	959.52	220
809	0.0667	25.6222	7	10.85	719.64	220
810	0.0667	30.7046	6.3	8.31667	1529.24	220
811	0.0667	36.5817	5.7	9.4619	1259.37	220
812	0.0667	38.6657	7.4	7.75688	2398.8	220
813	0.0667	39.3253	6.1	9.058	1499.25	220
814	0.0667	39.3853	7.2	10.2595	1184.41	220
815	0.0667	39.4603	6	8.09097	2158.92	220
816	0.0667	39.7751	10.5	18.5833	269.865	220
817	0.0667	41.0945	10.8	12.7628	644.678	220
818	0.0667	43.913	8.5	16	434.783	220
819	0.0667	44.9025	6.8	8.87368	1709.15	220
820	0.0667	49.5652	9	10.6696	1379.31	220
821	0.0667	52.3088	7.1	13.4313	719.64	220
822	0.0667	52.7586	6.7	10.8152	1379.31	220
823	0.0667	53.3283	8.3	8.6436	2578.71	220
824	0.0667	55.1124	6	7.9235	3253.37	220
825	0.0667	61.4093	7.4	8.65855	2893.55	220
826	0.0667	61.4693	13.4	17.0833	449.775	220
827	0.0667	62.3688	10.5	13.5113	794.603	220
828	0.0667	70.06	10.8	12.864	1124.44	220
829	0.0667	73.0435	8.4	10.0444	1889.06	220
830	0.0667	75.6072	7.8	10.3544	2038.98	220
831	0.0667	82.8336	7.8	9.71452	2788.61	220
832	0.0667	88.6807	7.9	13.0683	1514.24	220
833	0.0667	89.2204	10.1	10.639	2188.91	220
834	0.0667	92.1889	13.7	19.5405	554.723	220
835	0.0667	92.6687	9.9	10.0832	2413.79	220
836	0.0667	95.0375	10.5	12.279	1709.15	220
837	0.0667	99.1004	9.5	9.83247	2908.55	220
838	0.0667	100.735	7.5	13.4306	1079.46	220
839	0.0667	101.889	12.8	11.8642	1634.18	220
840	0.0667	104.528	14.1	23.5783	344.828	220
841	0.0667	104.843	10.5	17.0083	899.55	220
842	0.0667	107.076	9.2	13.638	1379.31	220
843	0.0667	118.006	14.8	18.9155	869.565	220
844	0.0667	140.975	12.7	17.7235	1019.49	220
845	0.0667	151.289	11.6	19.8143	734.633	220
846	0.0667	160.045	11.7	17.7662	1154.42	220
847	0.0667	3.86807	0.9	9.04444	134.933	220
848	0.0667	4.15292	6.3	9.34	149.925	220
849	0.0667	7.51124	4.5	8.18077	389.805	220
850	0.0667	7.72114	4.7	6.94571	524.738	220
851	0.0667	15.937	6.2	8.45833	539.73	220
852	0.0667	17.1964	8.3	9.65625	479.76	220
853	0.0667	19.0555	7	9.29429	524.738	220
854	0.0667	20.8396	3.5	7.83951	1214.39	220
855	0.0667	24.2729	8.1	13.045	299.85	220
856	0.0667	28.8606	7.2	8.6338	1064.47	220
857	0.0667	36.4768	5.2	12.1178	674.663	220
858	0.0667	42.4288	8.8	10.4105	854.573	220
859	0.0667	45.4273	6.8	12.6861	539.73	220
860	0.0667	45.907	10.5	11.5408	734.633	220
861	0.0667	46.1769	7.8	12.0478	689.655	220
862	0.0667	46.5817	7.2	9.62857	1259.37	220
863	0.0667	46.9265	6.4	10.4825	944.528	220
864	0.0667	47.7061	9	9.32264	1589.21	220
865	0.0667	48.1259	8	15.5	449.775	220
866	0.0667	48.5157	9	15.4594	479.76	220
867	0.0667	48.9205	7	10.7291	824.588	220
868	0.0667	49.1304	8.2	10.9016	929.535	220
869	0.0667	49.8501	6.8	10.3089	1184.41	220
870	0.0667	50.5697	6.7	8.82828	1484.26	220
871	0.0667	50.8696	7.4	13.6625	479.76	220
872	0.0667	52.009	12.7	10.5386	1049.48	220
873	0.0667	57.5712	10	11.2356	884.558	220
874	0.0667	62.5337	8	12.6176	1019.49	220
875	0.0667	64.078	13.5	21.0063	239.88	220
876	0.0667	71.2744	9.5	12.0938	1199.4	220
877	0.0667	72.6537	10	20.7944	269.865	220
878	0.0667	73.2234	13.5	13.9034	869.565	220
879	0.0667	76.6567	10.3	12.5985	1034.48	220
880	0.0667	79.7601	10.5	10.2008	1799.1	220
881	0.0667	83.0135	16.3	16.9829	524.738	220
882	0.0667	96.2819	10.7	15.9711	674.663	220
883	0.0667	96.8516	14	22.4174	344.828	220
884	0.0667	104.948	15.7	19.0419	464.768	220
885	0.0667	105.757	14.5	20.3167	359.82	220
886	0.0667	116.867	15.3	16.0979	704.648	220
887	0.0667	117.376	19.1	26.8882	254.873	220
888	0.0667	122.264	14.2	11.0718	2338.83	220
889	0.0667	123.853	10.8	11.7656	1874.06	220
890	0.0667	137.961	12.7	14.3959	1109.45	220
891	0.0667	138.741	14	12.9252	1604.2	220
892	0.0667	154.438	22.3	25.212	374.813	220
893	0.0667	158.171	21.5	16.0679	1169.42	220
894	0.0667	161.634	9.7	11.9846	2233.88	220
895	0.0667	165.472	15.7	13.7474	1424.29	220
896	0.0667	12.4138	4.9	7.82889	674.663	220
897	0.0667	14.4528	4.4	7.58148	809.595	220
898	0.0667	16.4318	6.3	8.9175	599.7	220
899	0.0667	17.5112	5.5	8.79615	779.61	220
900	0.0667	18.3358	5.4	8.12456	854.573	220
901	0.0667	19.955	5.4	9.7	539.73	220
902	0.0667	24.6927	5.3	9.75217	689.655	220
903	0.0667	35.8621	7	12.2488	644.678	220
904	0.0667	37.3613	6.3	10.68	749.625	220
905	0.0667	40.2849	8.4	10.4203	884.558	220
906	0.0667	56.3118	7.7	12.4373	884.558	220
907	0.0667	58.6507	6.5	9.72385	1634.18	220
908	0.0667	63.6732	9	11.8047	1274.36	220
909	0.0667	71.5142	8.1	19.1667	404.798	220
910	0.0667	73.7331	14	20.0231	389.805	220
911	0.0667	74.3328	8.6	10.9855	1649.18	220
912	0.0667	77.6162	6.8	9.61627	2488.76	220
913	0.0667	85.922	8.5	14.1933	1124.44	220
914	0.0667	94.4378	11.5	14.1109	959.52	220
915	0.0667	103.043	12	11.9752	1634.18	220
916	0.0667	166.027	8.7	18.6771	914.543	220
917	0.0667	184.708	17.6	24.2	389.805	220
918	0.08	28.3125	14.2	24.02	125	220
919	0.08	29.5	10.2	15.1038	325	220
920	0.08	46.4625	8.7	18.6393	350	220
921	0.08	47.0375	9.6	10.2613	1550	220
922	0.08	68.3	11.7	18.0762	525	220
923	0.08	78.825	13.5	11.6636	1887.5	220
924	0.08	102.362	8.9	13.3406	1725	220
925	0.0667	8.84558	5.2	8.25806	464.768	220
926	0.0667	14.2579	5.9	7.49815	809.595	220
927	0.0667	16.8516	12.2	17.7429	104.948	220
928	0.0667	19.5952	10.3	11.5583	359.82	220
929	0.0667	20.2099	10.8	17.4625	119.94	220
930	0.0667	25.0525	6.6	8.77532	1154.42	220
931	0.0667	35.7121	8.5	8.31238	1574.21	220
932	0.0667	38.3208	15.5	17.2875	239.88	220
933	0.0667	44.8276	8.9	13.6667	584.708	220
934	0.0667	46.9715	7.5	9.57798	1634.18	220
935	0.0667	48.7406	10.9	12.9042	719.64	220
936	0.0667	52.1889	9.6	14.1081	554.723	220
937	0.0667	53.2834	12.7	15.5143	419.79	220
938	0.0667	55.5922	11.3	12.4823	929.535	220
939	0.0667	61.964	7.6	9.92727	1979.01	220
940	0.0667	62.9535	7.7	9.6558	2068.97	220
941	0.0667	67.1514	7.7	11.4674	1334.33	220
942	0.0667	68.5607	10.7	14.2526	854.573	220
943	0.0667	69.7301	7.3	10.4447	1709.15	220
944	0.0667	73.4783	11.3	13.1609	959.52	220
945	0.0667	73.913	9.4	10.4215	1814.09	220
946	0.0667	90.3898	10.8	10.8027	2188.91	220
947	0.0667	104.123	7.4	13.8921	1334.33	220
948	0.0667	104.948	13.2	14.815	899.55	220
949	0.0667	113.238	10.9	11.124	2248.88	220
950	0.0667	142.489	16.8	28.8944	269.865	220
951	0.0667	158.396	11.7	13.429	2173.91	220
952	0.0667	233.748	9.4	16.4336	2098.95	220
953	0.0667	4.54273	4	7.08333	359.82	220
954	0.0667	13.2234	6	7.13768	1034.48	220
955	0.0667	16.1169	6.3	9.04894	704.648	220
956	0.0667	16.9265	7.3	8.43448	869.565	220
957	0.0667	18.6057	7.8	14.1625	239.88	220
958	0.0667	22.8936	8.7	11.4222	539.73	220
959	0.0667	23.4783	3.5	10.57	599.7	220
960	0.0667	24.1679	7.5	8.44648	1064.47	220
961	0.0667	24.5577	7	14.6263	284.858	220
962	0.0667	25.0825	4.7	7.97526	1454.27	220
963	0.0667	25.8771	12.2	12.3103	434.783	220
964	0.0667	25.982	7.2	10.014	854.573	220
965	0.0667	31.8141	6.7	9.92535	1064.47	220
966	0.0667	32.5487	12.8	12.037	689.655	220
967	0.0667	32.8336	6.7	8.96404	1334.33	220
968	0.0667	36.1619	7	10.3983	899.55	220
969	0.0667	37.4663	8.7	12.4543	689.655	220
970	0.0667	37.991	7.1	10.5986	1064.47	220
971	0.0667	42.084	11.2	16.76	299.85	220
972	0.0667	42.8186	9.7	13.0667	764.618	220
973	0.0667	44.1529	8.8	11.4031	959.52	220
974	0.0667	47.2864	8	9.35806	1859.07	220
975	0.0667	49.8651	10	13.9638	704.648	220
976	0.0667	54.8426	8.8	12.65	899.55	220
977	0.0667	55.1724	10.7	11.133	1364.32	220
978	0.0667	58.5757	8.5	13.0763	884.558	220
979	0.0667	62.2939	11.8	10.1524	1889.06	220
980	0.0667	64.003	11.5	15.3816	734.633	220
981	0.0667	69.0705	14.5	18.3	464.768	220
982	0.0667	69.3703	9.2	10.0641	2173.91	220
983	0.0667	69.4753	7.7	12.6947	1124.44	220
984	0.0667	70.9445	12.8	13.569	869.565	220
985	0.0667	72.7886	10.2	11.833	1499.25	220
986	0.0667	73.5082	14.2	13.0312	1199.4	220
987	0.0667	75.8471	14.3	24.3118	254.873	220
988	0.0667	81.6042	10.7	17.7	599.7	220
989	0.0667	83.4633	9.7	11.5491	1589.21	220
990	0.0667	91.1094	14.7	12.476	1439.28	220
991	0.0667	94.8726	7.2	15.1677	929.535	220
992	0.0667	95.8171	10.7	11.8102	2053.97	220
993	0.0667	100.705	12.7	13.0747	1304.35	220
994	0.0667	100.975	10.2	9.74254	3418.29	220
995	0.0667	112.384	10	13.2505	1514.24	220
996	0.0667	121.859	2.5	18.3132	794.603	220
997	0.0667	176.267	18	21.76	749.625	220
998	0.0667	5.0075	4	7.01786	419.79	220
999	0.0667	6.95652	4.1	7.20294	509.745	220
1000	0.0667	11.6192	6.8	9.38333	359.82	220
1001	0.0667	13.1334	5.6	8.49024	614.693	220
1002	0.0667	13.958	7.7	9.14444	539.73	220
1003	0.0667	15.907	6	8.59	749.625	220
1004	0.0667	17.4813	8.8	17.9	119.94	220
1005	0.0667	17.7211	5.6	8.70217	689.655	220
1006	0.0667	17.991	7.8	10.2692	584.708	220
1007	0.0667	20.4798	4.8	8.17973	1109.45	220
1008	0.0667	21.994	9	13.53	299.85	220
1009	0.0667	23.7481	8.2	10.7444	539.73	220
1010	0.0667	26.057	10.9	21.9857	104.948	220
1011	0.0667	38.6657	10.9	14.5192	389.805	220
1012	0.0667	42.9685	7.3	11.3344	914.543	220
1013	0.0667	46.7316	13.3	22.7	149.925	220
1014	0.0667	51.4393	11	15.0314	524.738	220
1015	0.0667	57.8711	12.4	10.3762	1514.24	220
1016	0.0667	59.7001	12.2	16.5903	464.768	220
1017	0.0667	62.5787	7.5	14.168	749.625	220
1018	0.0667	63.4183	10.9	12.0463	1004.5	220
1019	0.0667	64.5727	14	16.7258	464.768	220
1020	0.0667	93.7031	12.3	15.3214	839.58	220
1021	0.0667	99.8651	13.1	12.8911	1349.33	220
1022	0.0667	107.826	12	16.0927	614.693	220
1023	0.0667	111.844	9.5	14.8941	1019.49	220
1024	0.0667	113.433	12.9	16.8321	839.58	220
1025	0.0667	124.903	13.7	19.2638	704.648	220
1026	0.0667	134.528	7.5	14.0912	1364.32	220
1027	0.0667	134.918	15.6	18.9552	869.565	220
1028	0.0667	2.68366	3.2	20.6	14.9925	220
1029	0.0667	2.96852	4.1	6.43684	284.858	220
1030	0.0667	3.02849	3.3	12.5333	44.9775	220
1031	0.0667	9.14543	6.1	8.19706	509.745	220
1032	0.0667	20.015	8.8	11.996	374.813	220
1033	0.0667	21.8141	6.8	7.6989	1364.32	220
1034	0.0667	22.3388	2	24.45	59.97	220
1035	0.0667	29.3853	9	8.61628	1289.36	220
1036	0.0667	30.5247	5.8	12.81	449.775	220
1037	0.0667	30.9595	7.3	11.7526	569.715	220
1038	0.0667	33.0435	11.3	12.82	374.813	220
1039	0.0667	34.048	8.2	9.89857	1049.48	220
1040	0.0667	34.2579	5.7	10.8541	554.723	220
1041	0.0667	36.9865	8.4	14.0679	419.79	220
1042	0.0667	37.2714	6.7	12.4	479.76	220
1043	0.0667	39.1454	9.8	11.252	749.625	220
1044	0.0667	39.7601	11.3	15.3619	314.843	220
1045	0.0667	46.1769	12.7	19.925	239.88	220
1046	0.0667	49.94	9.8	11.293	854.573	220
1047	0.0667	50.9295	19	22.0067	224.888	220
1048	0.0667	54.018	10.4	12.3868	794.603	220
1049	0.0667	54.048	2	26.9778	134.933	220
1050	0.0667	57.0315	10.4	18.388	374.813	220
1051	0.0667	57.1664	9	11.628	1124.44	220
1052	0.0667	58.096	14.5	21.9062	239.88	220
1053	0.0667	59.0255	10.6	16.4893	419.79	220
1054	0.0667	60.8696	9.7	16.625	419.79	220
1055	0.0667	61.0345	14.7	23.7154	194.903	220
1056	0.0667	61.3343	11.7	11.3	1109.45	220
1057	0.0667	63.8831	9	9.44805	2308.85	220
1058	0.0667	66.4168	16.3	19.512	374.813	220
1059	0.0667	69.5052	19	28.6364	164.918	220
1060	0.0667	71.0345	13.5	15.8128	584.708	220
1061	0.0667	77.6912	14.6	31.29	149.925	220
1062	0.0667	81.1544	10.1	15.7267	674.663	220
1063	0.0667	81.5592	11.9	9.76139	2368.82	220
1064	0.0667	87.901	12.3	12.1111	1214.39	220
1065	0.0667	88.9505	15.1	21.7278	269.865	220
1066	0.0667	92.009	11.8	12.2884	1424.29	220
1067	0.0667	94.3178	10.1	11.9	1514.24	220
1068	0.0667	108.591	9.7	12.549	1559.22	220
1069	0.0667	111.874	9.6	11.469	2128.94	220
1070	0.0667	111.904	11.6	16.9	659.67	220
1071	0.0667	111.994	10.5	12.69	1649.18	220
1072	0.0667	117.586	2.3	13.6546	1484.26	220
1073	0.0667	121.349	13	16.6273	824.588	220
1074	0.0667	123.403	14.8	25.988	374.813	220
1075	0.0667	124.978	15.9	15.55	1079.46	220
1076	0.0667	126.807	12.8	14.8449	1169.42	220
1077	0.0667	128.201	18	17.7259	809.595	220
1078	0.0667	130.525	13.7	18.0549	764.618	220
1079	0.0667	131.664	9.1	12.6362	2233.88	220
1080	0.0667	133.733	11.4	13.953	1724.14	220
1081	0.0667	135.697	12.7	23.9143	419.79	220
1082	0.0667	136.192	11.8	16.4375	1079.46	220
1083	0.0667	151.184	18.6	16.2761	1064.47	220
1084	0.0667	164.153	15	15.3582	1544.23	220
1085	0.0667	172.219	19.4	19.3574	1019.49	220
1086	0.0667	1.76912	1.9	17	14.9925	220
1087	0.0667	9.32534	5.1	6.06986	1094.45	220
1088	0.0667	15.6222	9.5	14.4273	164.918	220
1089	0.0667	20.7046	7.4	11.504	374.813	220
1090	0.0667	26.8666	7.5	9.88605	644.678	220
1091	0.0667	35.7121	10.2	12.5235	509.745	220
1092	0.0667	40.6597	8.4	16.2091	329.835	220
1093	0.0667	41.3343	8.8	10.525	899.55	220
1094	0.0667	47.0015	8.1	10.1829	1229.39	220
1095	0.0667	48.7256	12.3	17.9	299.85	220
1096	0.0667	51.1844	1.3	14.5375	479.76	220
1097	0.0667	52.4438	8.1	12.5	989.505	220
1098	0.0667	52.9835	8.9	13.3344	479.76	220
1099	0.0667	55.3973	10.3	21.34	224.888	220
1100	0.0667	55.7421	10.1	19.86	224.888	220
1101	0.0667	59.7451	8.2	10.4676	1064.47	220
1102	0.0667	63.1034	14.9	30.9	104.948	220
1103	0.0667	63.1184	13.8	11.2899	1184.41	220
1104	0.0667	68.6957	15.4	17.02	374.813	220
1105	0.0667	78.6507	16.7	19.5269	389.805	220
1106	0.0667	79.7601	14.1	15.8697	494.753	220
1107	0.0667	81.7841	12.9	15.33	749.625	220
1108	0.0667	84.2429	13.5	14.6431	869.565	220
1109	0.0667	85.3523	13.1	16.7971	509.745	220
1110	0.0667	92.8486	10.2	11.9385	1634.18	220
1111	0.0667	99.2204	17.1	14.2136	989.505	220
1112	0.0667	104.648	1.4	17.38	449.775	220
1113	0.0667	114.468	17.3	20.9849	494.753	220
1114	0.0667	118.381	14.4	18.2896	719.64	220
1115	0.0667	121.394	12.3	14.7246	854.573	220
1116	0.0667	122.399	23.3	20.0091	494.753	220
1117	0.0667	124.933	14.2	11.896	1874.06	220
1118	0.0667	128.321	13.2	13.4295	1574.21	220
1119	0.0667	133.838	12.9	15.2471	1049.48	220
1120	0.0667	134.048	13.5	12.3324	2218.89	220
1121	0.0667	145.277	16.1	15.7394	989.505	220
1122	0.0667	167.646	10.2	13.9955	1664.17	220
1123	0.0667	176.147	14	18.3292	974.513	220
1124	0.0667	235.802	21.8	29.4185	404.798	220
1125	0.0667	13.4033	11.3	12.6154	194.903	220
1126	0.0667	20.2699	8	10.1758	494.753	220
1127	0.0667	25.1574	8.7	14.2765	254.873	220
1128	0.0667	30.3298	9.8	11.035	599.7	220
1129	0.0667	32.1589	8.5	11.8789	569.715	220
1130	0.0667	44.9775	6.5	10	14.9925	220
1131	0.0667	55.1724	11.2	15.5212	494.753	220
1132	0.0667	64.7976	10	10.1632	1424.29	220
1133	0.0667	64.8726	12.2	15.2441	509.745	220
1134	0.0667	65.8021	9.2	12.8395	644.678	220
1135	0.0667	74.9625	9.8	14	14.9925	220
1136	0.0667	78.1859	8.9	9.40305	2458.77	220
1137	0.0667	89.955	8	10	14.9925	220
1138	0.0667	93.3733	15	11.9919	1304.35	220
1139	0.0667	102.414	19.2	20.1036	419.79	220
1140	0.0667	107.481	8.5	11.5505	1634.18	220
1141	0.0667	119.4	12.9	16.56	674.663	220
1142	0.0667	141.244	9.7	13.061	1844.08	220
1143	0.0667	142.324	14.7	19.0349	644.678	220
1144	0.08	49.125	8.7	12.2625	700	220
1145	0.08	99.625	9	8.37667	4125	220
1146	0.0667	5.03748	8.7	8.04118	254.873	220
1147	0.0667	16.2369	7.5	9.14146	614.693	220
1148	0.0667	25.0675	7.6	10.1317	614.693	220
1149	0.0667	28.5457	13	16.9	179.91	220
1150	0.0667	29.1004	10.3	13.1143	314.843	220
1151	0.0667	30.2699	15.6	15.25	239.88	220
1152	0.0667	30.9445	6.3	8.67381	1259.37	220
1153	0.0667	32.5187	11.7	11.9033	449.775	220
1154	0.0667	33.3433	9.4	9.31392	1184.41	220
1155	0.0667	34.078	14.8	12.2788	494.753	220
1156	0.0667	35.2024	11.2	13.0539	389.805	220
1157	0.0667	36.8666	12.3	11.2043	704.648	220
1158	0.0667	41.979	6	7	14.9925	220
1159	0.0667	46.4318	8.6	10.276	1124.44	220
1160	0.0667	47.3163	12.4	15.948	374.813	220
1161	0.0667	51.0795	9.4	10.0451	1064.47	220
1162	0.0667	51.4993	7.8	10.6256	1169.42	220
1163	0.0667	56.3268	14.5	12.2531	734.633	220
1164	0.0667	59.6102	17.1	14.58	524.738	220
1165	0.0667	61.0195	16.9	11.7615	974.513	220
1166	0.0667	61.4843	13.3	13.9659	659.67	220
1167	0.0667	66.5967	12.8	9.2872	1874.06	220
1168	0.0667	67.3913	12.8	11.5643	1049.48	220
1169	0.0667	69.6252	13.8	12.4338	1064.47	220
1170	0.0667	70.9145	9.8	9.7712	1874.06	220
1171	0.0667	73.0285	13	14.4409	659.67	220
1172	0.0667	76.8216	12.6	14.5926	809.595	220
1173	0.0667	79.4003	7	8.69077	2923.54	220
1174	0.0667	80.09	9.6	10.0253	2128.94	220
1175	0.0667	80.4648	10.8	10.8787	1619.19	220
1176	0.0667	80.5847	10.5	9.55411	2188.91	220
1177	0.0667	92.1139	7.2	11.7139	1514.24	220
1178	0.0667	93.2834	9.2	7.28671	6206.9	220
1179	0.0667	96.1769	12.2	10.5863	1859.07	220
1180	0.0667	96.7316	11.9	16.2146	614.693	220
1181	0.0667	98.1409	11.9	18.6286	524.738	220
1182	0.0667	100.195	6.3	12.5704	1214.39	220
1183	0.0667	113.358	15.8	16.637	689.655	220
1184	0.0667	114.573	14.4	11.9505	1454.27	220
1185	0.0667	118.561	14.6	21.0938	479.76	220
1186	0.0667	120.36	1.6	12.9898	1319.34	220
1187	0.0667	121.304	15.2	13.7	1439.28	220
1188	0.0667	128.486	14.5	17.0319	704.648	220
1189	0.0667	130.03	12.7	14.0868	1364.32	220
1190	0.0667	171.274	16.5	26.9667	359.82	220
1191	0.0667	171.799	13.6	13.6547	2083.96	220
1192	0.0667	174.243	12.3	13.3722	1994	220
1193	0.0667	181.124	20.8	21.3521	719.64	220
1194	0.0667	210.435	19.9	18.7864	884.558	220
1195	0.0667	222.324	14.1	11.7955	3028.49	220
1196	0.0667	23.0735	4.4	7.69205	1319.34	230
1197	0.0667	44.9775	6.8	11.9741	869.565	230
1198	0.0667	67.3763	10.2	9.32985	2009	230
1199	0.0667	2.29385	1.6	6.16316	284.858	230
1200	0.0667	13.8531	4	6.19907	1604.2	230
1201	0.0667	14.8876	6.4	10.6048	314.843	230
1202	0.0667	18.1259	5.2	8.95	569.715	230
1203	0.0667	18.8606	4.5	6.81545	1649.18	230
1204	0.0667	19.6852	5.3	7.04848	1484.26	230
1205	0.0667	20.1649	3.9	7.09515	1544.23	230
1206	0.0667	22.5487	4	7.31101	1634.18	230
1207	0.0667	23.6132	4.7	7.88721	1289.36	230
1208	0.0667	23.7181	5.2	7.93625	1199.4	230
1209	0.0667	24.1529	3.6	8.24861	1079.46	230
1210	0.0667	24.3478	5.7	7.9597	1004.5	230
1211	0.0667	25.3073	3.4	9.77451	764.618	230
1212	0.0667	25.3973	5.4	8.3725	1199.4	230
1213	0.0667	26.072	6.6	9.92683	614.693	230
1214	0.0667	27.5712	7.3	7.64712	1559.22	230
1215	0.0667	28.2759	6.8	11.4867	449.775	230
1216	0.0667	29.5352	5.9	9.46429	629.685	230
1217	0.0667	29.8801	5.2	7.32044	2053.97	230
1218	0.0667	30.8096	6.2	8.67209	1289.36	230
1219	0.0667	30.8696	6.1	9.17903	929.535	230
1220	0.0667	32.4438	5.8	7.56187	2083.96	230
1221	0.0667	32.7736	4.5	7.45648	1619.19	230
1222	0.0667	34.7676	8.5	15	299.85	230
1223	0.0667	36.8366	6.3	9.36111	809.595	230
1224	0.0667	37.4963	8.2	9.22537	1004.5	230
1225	0.0667	37.6462	6.1	8.14696	1724.14	230
1226	0.0667	38.1109	4.4	7.975	1499.25	230
1227	0.0667	39.0705	8.8	12.725	419.79	230
1228	0.0667	39.5802	10	12	599.7	230
1229	0.0667	40.3148	5.6	9.92264	794.603	230
1230	0.0667	40.3748	8	9.50147	1019.49	230
1231	0.0667	40.3898	8.5	12.1325	599.7	230
1232	0.0667	40.4648	9	10.8526	854.573	230
1233	0.0667	42.7286	8	12.0348	689.655	230
1234	0.0667	43.4483	6.2	9.38537	1229.39	230
1235	0.0667	45.1874	10.6	13.9893	419.79	230
1236	0.0667	45.7571	9.8	13.3429	419.79	230
1237	0.0667	46.1919	6.5	9.13621	869.565	230
1238	0.0667	46.3868	5.7	8.79796	1469.27	230
1239	0.0667	47.6162	6.5	9.12315	1619.19	230
1240	0.0667	50.8246	8.1	10.6546	989.505	230
1241	0.0667	51.1544	7.7	9.21685	1334.33	230
1242	0.0667	51.7091	7.2	9.51644	1094.45	230
1243	0.0667	52.2639	11.2	12.4543	524.738	230
1244	0.0667	52.7136	7.3	9.65645	929.535	230
1245	0.0667	53.1034	9.1	13.8114	524.738	230
1246	0.0667	53.5532	7.1	7.90736	2443.78	230
1247	0.0667	54.1079	5.1	8.94444	1484.26	230
1248	0.0667	55.1574	6.4	13.4978	689.655	230
1249	0.0667	55.2174	6.9	11.2032	944.528	230
1250	0.0667	56.1769	8.1	15.4267	449.775	230
1251	0.0667	59.2504	6.2	10.8966	884.558	230
1252	0.0667	59.3253	8.6	10.1033	914.543	230
1253	0.0667	60.1049	8.8	9.19669	1814.09	230
1254	0.0667	60.2849	10.2	14.8769	584.708	230
1255	0.0667	60.6147	6	8.44876	1814.09	230
1256	0.0667	60.8396	6.3	10.3072	1454.27	230
1257	0.0667	63.8681	10	12.6826	689.655	230
1258	0.0667	64.1529	7.2	11.8529	1049.48	230
1259	0.0667	64.4528	7	9.93945	1634.18	230
1260	0.0667	66.7766	7	11.807	1064.47	230
1261	0.0667	66.8366	7	9.50394	1904.05	230
1262	0.0667	67.2564	8.4	8.49882	2533.73	230
1263	0.0667	70	9.2	14.9027	554.723	230
1264	0.0667	70.1649	7.4	11.8	1034.48	230
1265	0.0667	71.1094	7.4	8.98047	1919.04	230
1266	0.0667	72.9835	8.5	10.6056	1064.47	230
1267	0.0667	73.2984	6.7	9.58243	2218.89	230
1268	0.0667	74.1829	4.5	9.65567	1454.27	230
1269	0.0667	75.2924	10.9	21.1045	329.835	230
1270	0.0667	76.1319	7.1	9.32177	2203.9	230
1271	0.0667	76.7316	7.5	12.4329	1139.43	230
1272	0.0667	79.0555	8.3	9.72562	1814.09	230
1273	0.0667	79.5802	8	11.6974	1169.42	230
1274	0.0667	80.8546	11.5	15.0116	644.678	230
1275	0.0667	81.5292	11.8	18.0733	449.775	230
1276	0.0667	82.3988	10.2	16.6657	524.738	230
1277	0.0667	82.4138	6.7	10.8252	1604.2	230
1278	0.0667	82.4738	13.5	14.1959	734.633	230
1279	0.0667	82.6687	7.1	10.1252	2083.96	230
1280	0.0667	82.8186	12.2	15.7	569.715	230
1281	0.0667	83.2084	10.4	9.62857	2203.9	230
1282	0.0667	84.6627	7.5	10.4954	1634.18	230
1283	0.0667	85.2624	9.5	10.9667	1349.33	230
1284	0.0667	85.6672	7.8	14.9917	539.73	230
1285	0.0667	86.8366	10	12.5281	1229.39	230
1286	0.0667	88.051	8.1	13.469	1064.47	230
1287	0.0667	88.4258	11.2	17.7152	494.753	230
1288	0.0667	89.97	8.6	11.4738	1544.23	230
1289	0.0667	90	12.7	13.763	809.595	230
1290	0.0667	91.5892	7.2	9.08093	2908.55	230
1291	0.0667	91.7841	10.7	14.4769	779.61	230
1292	0.0667	95.0675	9.9	11.2934	1829.09	230
1293	0.0667	95.8921	8.3	14.2848	884.558	230
1294	0.0667	97.8411	8.7	14.62	674.663	230
1295	0.0667	98.2309	10.8	11.5228	1514.24	230
1296	0.0667	99.2054	11	13.2528	794.603	230
1297	0.0667	99.8801	7.8	8.66147	3463.27	230
1298	0.0667	100.795	5.4	14.5023	644.678	230
1299	0.0667	102.939	9.4	13.7423	779.61	230
1300	0.0667	104.528	11.8	20.0192	389.805	230
1301	0.0667	104.933	8.1	11.1391	1919.04	230
1302	0.0667	105.742	12.8	18.7182	494.753	230
1303	0.0667	106.297	8.3	12.6268	1229.39	230
1304	0.0667	106.642	8.8	15.4652	689.655	230
1305	0.0667	107.481	8.1	13.6131	914.543	230
1306	0.0667	107.766	9.8	14.4519	779.61	230
1307	0.0667	110.54	8.7	12.3505	1484.26	230
1308	0.0667	111.124	9.2	9.86429	1889.06	230
1309	0.0667	114.918	10.6	12.279	854.573	230
1310	0.0667	116.402	8.9	12.0239	1754.12	230
1311	0.0667	116.672	15	22.5933	224.888	230
1312	0.0667	116.717	15.5	21.4107	419.79	230
1313	0.0667	119.505	7.5	10.5276	1844.08	230
1314	0.0667	119.745	10	10.8633	2488.76	230
1315	0.0667	120.795	10.1	11.4238	1199.4	230
1316	0.0667	123.313	11	14.9129	1049.48	230
1317	0.0667	123.793	13.8	16.5108	554.723	230
1318	0.0667	124.168	15.4	14.165	1199.4	230
1319	0.0667	124.858	5.9	9.80725	2893.55	230
1320	0.0667	124.873	12.3	16.18	524.738	230
1321	0.0667	127.751	6.3	8.87356	4932.53	230
1322	0.0667	129.85	13.6	17.522	749.625	230
1323	0.0667	131.154	13.5	23.45	239.88	230
1324	0.0667	131.919	10.9	11.7835	1544.23	230
1325	0.0667	132.639	11.9	14.1957	1034.48	230
1326	0.0667	133.958	8.9	13.5419	1109.45	230
1327	0.0667	134.093	8.6	10.8415	2383.81	230
1328	0.0667	134.423	10.2	14.1892	974.513	230
1329	0.0667	136.042	9.5	9.89462	3343.33	230
1330	0.0667	139.085	6.4	9.91613	2323.84	230
1331	0.0667	146.642	12.9	15.2786	839.58	230
1332	0.0667	151.649	14.1	17.6289	674.663	230
1333	0.0667	153.898	16.4	14.5	1094.45	230
1334	0.0667	156.507	16.5	19.6687	479.76	230
1335	0.0667	160.57	16.2	16.1576	884.558	230
1336	0.0667	161.844	9.4	12.2906	1439.28	230
1337	0.0667	167.856	11	11.705	1814.09	230
1338	0.0667	168.876	7.9	10.7662	2263.87	230
1339	0.0667	175.442	11.5	14.0541	1469.27	230
1340	0.0667	184.708	8.9	10.3096	3283.36	230
1341	0.0667	185.202	10.6	17.4037	1214.39	230
1342	0.0667	188.216	9.8	12.8616	1874.06	230
1343	0.0667	188.456	11.9	16.5167	1079.46	230
1344	0.0667	191.184	19	15.4677	464.768	230
1345	0.0667	191.529	10.2	11.4203	2293.85	230
1346	0.0667	196.102	18.5	18.7776	734.633	230
1347	0.0667	197.256	17.2	24.3423	389.805	230
1348	0.0667	205.292	10.2	10.4234	4107.95	230
1349	0.0667	205.367	17.2	15.0841	1319.34	230
1350	0.0667	213.538	13	13.453	1979.01	230
1351	0.0667	217.391	12	19.8232	1034.48	230
1352	0.0667	217.841	16.4	15.7526	1709.15	230
1353	0.0667	226.162	14.7	15.225	1319.34	230
1354	0.0667	231.019	17.4	29.7789	284.858	230
1355	0.0667	232.474	19	20.4704	659.67	230
1356	0.0667	240.45	14.4	15.7852	1214.39	230
1357	0.0667	248.276	19	30	344.828	230
1358	0.0667	257.421	11.9	19.1674	689.655	230
1359	0.0667	260.255	10.9	13.6739	1784.11	230
1360	0.0667	326.567	18.8	21.6569	869.565	230
1361	0.0667	339.4	22.6	21.2672	914.543	230
1362	0.0667	516.972	16.6	21.2924	1379.31	230
1363	0.0667	588.906	15.7	17.3564	2578.71	230
1364	0.0667	127.106	12	14.92	524.738	230
1365	0.0667	297.556	18.5	20.5053	569.715	230
1366	0.0667	315.952	20	25.36	374.813	230
1367	0.0667	93.7181	12.1	21.3083	179.91	230
1368	0.0667	171.289	16.5	27.4167	179.91	230
1369	0.0667	178.411	15.1	21.1727	329.835	230
1370	0.0667	224.543	16.4	21.0556	404.798	230
1371	0.0667	272.804	17.5	21.2	479.76	230
1372	0.0667	272.804	17.5	21.2	479.76	230
1373	0.0667	272.804	17.5	21.2	479.76	230
1374	0.0667	272.804	17.5	21.2	479.76	230
1375	0.0667	272.804	17.5	21.2	479.76	230
1376	0.0667	285.637	19.7	26.935	299.85	230
1377	0.0667	285.637	19.7	26.935	299.85	230
1378	0.0667	285.637	19.7	26.935	299.85	230
1379	0.0667	322.804	18.6	21.2421	569.715	230
1380	0.0667	322.804	18.6	21.2421	569.715	230
1381	0.0667	322.804	18.6	21.2421	569.715	230
1382	0.0667	346.972	21.1	26.8167	359.82	230
1383	0.0667	346.972	21.1	26.8167	359.82	230
1384	0.0667	346.972	21.1	26.8167	359.82	230
1385	0.0667	346.972	21.1	26.8167	359.82	230
1386	0.0667	346.972	21.1	26.8167	359.82	230
1387	0.0667	374.513	19.6	21.2886	659.67	230
1388	0.0667	410.585	22.4	26.7143	419.79	230
1389	0.0667	410.585	22.4	26.7143	419.79	230
1390	0.0667	410.585	22.4	26.7143	419.79	230
1391	0.0667	410.585	22.4	26.7143	419.79	230
1392	0.0667	410.585	22.4	26.7143	419.79	230
1393	0.0667	410.585	22.4	26.7143	419.79	230
1394	0.0667	476.357	23.6	26.4906	479.76	230
1395	0.0667	476.357	23.6	26.4906	479.76	230
1396	0.0667	476.357	23.6	26.4906	479.76	230
1397	0.0667	476.357	23.6	26.4906	479.76	230
1398	0.0667	476.357	23.6	26.4906	479.76	230
1399	0.0667	476.357	23.6	26.4906	479.76	230
1400	0.0667	494.903	25.9	32.3773	329.835	230
1401	0.0667	574.153	27.3	32.472	374.813	230
1402	0.0667	40.1199	11.3	14.0391	344.828	230
1403	0.0667	48.2609	6.5	9.94091	1319.34	230
1404	0.0667	56.2369	9.5	14.937	404.798	230
1405	0.0667	60.4348	11.4	16.1379	434.783	230
1406	0.0667	69.4153	9.7	13.1481	809.595	230
1407	0.0667	76.9415	10.8	13.8227	659.67	230
1408	0.0667	78.066	7.9	12.7735	509.745	230
1409	0.0667	83.1484	11.6	10.917	1499.25	230
1410	0.0667	83.3883	8.6	12.8413	944.528	230
1411	0.0667	84.7226	7.1	11.5447	1274.36	230
1412	0.0667	91.0645	16.4	22.9706	254.873	230
1413	0.0667	93.4333	8.6	11.3544	1709.15	230
1414	0.0667	103.733	12.6	20.5208	359.82	230
1415	0.0667	109.52	7.8	11.8982	1649.18	230
1416	0.0667	116.417	11.2	17.0196	689.655	230
1417	0.0667	116.807	9.3	11.794	2009	230
1418	0.0667	116.942	13.5	13.2	14.9925	230
1419	0.0667	126.897	10	13.2291	1544.23	230
1420	0.0667	134.933	15	25	14.9925	230
1421	0.0667	138.306	21.7	28.6786	209.895	230
1422	0.0667	207.931	13.9	16.1973	1124.44	230
1423	0.0667	49.8351	12.5	15.5048	314.843	240
1424	0.0667	73.4933	12.4	11.6278	1079.46	240
1425	0.0667	78.9955	9.3	9.35659	1934.03	240
1426	0.0667	82.4588	15	18.2387	464.768	240
1427	0.0667	82.4588	15	22.3944	269.865	240
1428	0.0667	86.2369	20.3	24.7615	194.903	240
1429	0.0667	91.8441	9	16.9917	359.82	240
1430	0.0667	93.0285	11	13.9627	884.558	240
1431	0.0667	94.7826	13.8	14.8059	764.618	240
1432	0.0667	100.18	7.6	15.741	584.708	240
1433	0.0667	101.349	11.7	12.4388	1274.36	240
1434	0.0667	101.649	10.8	15.6045	659.67	240
1435	0.0667	113.133	18.9	23.735	299.85	240
1436	0.0667	114.438	16.1	24.8882	254.873	240
1437	0.0667	114.498	14.6	14.575	959.52	240
1438	0.0667	115.847	9.1	15.2636	824.588	240
1439	0.0667	119.16	12.8	15.1967	899.55	240
1440	0.0667	119.82	7.8	10.4724	1574.21	240
1441	0.0667	120.465	14.2	16.6973	554.723	240
1442	0.0667	123.688	10.3	13.7653	734.633	240
1443	0.0667	129.22	13	14.8985	989.505	240
1444	0.0667	129.94	7.5	10.1882	2788.61	240
1445	0.0667	130.465	14.8	22.3615	389.805	240
1446	0.0667	135.217	9	11.429	1964.02	240
1447	0.0667	154.498	13.8	18.0021	719.64	240
1448	0.0667	163.013	10.3	11.7303	2278.86	240
1449	0.0667	163.193	12.1	12.5437	1439.28	240
1450	0.0667	163.643	17.3	16.2619	629.685	240
1451	0.0667	174.843	11.3	13.533	1544.23	240
1452	0.0667	179.25	9.6	16.2232	839.58	240
1453	0.0667	187.091	14.8	17.29	899.55	240
1454	0.0667	190.075	15.8	16.5458	1079.46	240
1455	0.0667	191.619	16.8	15.4241	809.595	240
1456	0.0667	208.216	14.2	27.1158	284.858	240
1457	0.0667	208.516	24.8	26.7583	359.82	240
1458	0.0667	23.8381	4.2	7.90429	1049.48	250
1459	0.0667	42.9685	5.2	9.69222	1349.33	250
1460	0.0667	78.2459	5.8	7.76107	3658.17	250
1461	0.0667	37.4963	15.4	21.7667	134.933	250
1462	0.0667	55.6072	7	8.47292	2158.92	250
1463	0.0667	79.2054	8.1	10.5716	1529.24	250
1464	0.0667	121.409	15.5	24.3909	329.835	250
1465	0.0667	122.384	6.5	9.06148	3658.17	250
1466	0.0667	176.327	16.6	26.288	374.813	250
1467	0.0667	344.318	24.3	34.1471	254.873	250
1468	0.0667	380.855	23.9	31.5864	329.835	250
1469	0.0667	72.3688	9.6	14.7846	389.805	250
1470	0.0667	101.649	12.4	20.6706	254.873	250
1471	0.0667	159.985	12.6	14.9839	839.58	250
1472	0.0667	159.985	12.6	14.9839	839.58	250
1473	0.0667	178.426	15.1	20.6393	419.79	250
1474	0.0667	178.426	15.1	20.6393	419.79	250
1475	0.0667	198.696	17.4	26.55	269.865	250
1476	0.0667	201.214	15.8	20.9032	464.768	250
1477	0.0667	224.573	16.4	21.0147	509.745	250
1478	0.0667	224.573	16.4	21.0147	509.745	250
1479	0.0667	224.573	16.4	21.0147	509.745	250
1480	0.0667	224.573	16.4	21.0147	509.745	250
1481	0.0667	224.573	16.4	21.0147	509.745	250
1482	0.0667	227.001	18.2	26.735	299.85	250
1483	0.0667	227.001	18.2	26.735	299.85	250
1484	0.0667	227.001	18.2	26.735	299.85	250
1485	0.0667	227.001	18.2	26.735	299.85	250
1486	0.0667	227.001	18.2	26.735	299.85	250
1487	0.0667	227.001	18.2	26.735	299.85	250
1488	0.0667	227.001	18.2	26.735	299.85	250
1489	0.0667	227.001	18.2	26.735	299.85	250
1490	0.0667	255.967	19	26.9046	329.835	250
1491	0.0667	272.684	17.5	21.0927	614.693	250
1492	0.0667	272.684	17.5	21.0927	614.693	250
1493	0.0667	272.684	17.5	21.0927	614.693	250
1494	0.0667	272.684	17.5	21.0927	614.693	250
1495	0.0667	285.667	19.7	26.36	374.813	250
1496	0.0667	285.667	19.7	26.36	374.813	250
1497	0.0667	297.496	18	21.0667	674.663	250
1498	0.0667	297.496	18	21.0667	674.663	250
1499	0.0667	297.496	18	21.0667	674.663	250
1500	0.0667	297.496	18	21.0667	674.663	250
1501	0.0667	297.496	18	21.0667	674.663	250
1502	0.0667	346.972	21.1	26.8241	434.783	250
1503	0.0667	378.456	21.8	26.9645	464.768	250
1504	0.0667	378.456	21.8	26.9645	464.768	250
1505	0.0667	378.456	21.8	26.9645	464.768	250
1506	0.0667	378.456	21.8	26.9645	464.768	250
1507	0.0667	378.456	21.8	26.9645	464.768	250
1508	0.0667	378.456	21.8	26.9645	464.768	250
1509	0.0667	378.456	21.8	26.9645	464.768	250
1510	0.0667	378.456	21.8	26.9645	464.768	250
1511	0.0667	378.456	21.8	26.9645	464.768	250
1512	0.0667	378.456	21.8	26.9645	464.768	250
1513	0.0667	378.456	21.8	26.9645	464.768	250
1514	0.0667	378.456	21.8	26.9645	464.768	250
1515	0.0667	378.456	21.8	26.9645	464.768	250
1516	0.0667	378.456	21.8	26.9645	464.768	250
1517	0.0667	378.456	21.8	26.9645	464.768	250
1518	0.0667	378.456	21.8	26.9645	464.768	250
1519	0.0667	378.456	21.8	26.9645	464.768	250
1520	0.0667	410.57	22.4	26.9088	509.745	250
1521	0.0667	410.57	22.4	26.9088	509.745	250
1522	0.0667	410.57	22.4	26.9088	509.745	250
1523	0.0667	410.57	22.4	26.9088	509.745	250
1524	0.0667	410.57	22.4	26.9088	509.745	250
1525	0.0667	418.171	24.4	32.1652	344.828	250
1526	0.0667	443.298	23	27.0528	539.73	250
1527	0.0667	494.903	25.9	32.4885	389.805	250
1528	0.0667	65.967	12.4	18.6	14.9925	250
1529	0.0667	67.1814	9	14.5414	434.783	250
1530	0.0667	70.7496	10.6	14.7794	509.745	250
1531	0.0667	90.2399	5.2	7.8661	3538.23	250
1532	0.0667	103.598	13.2	13.5944	539.73	250
1533	0.0667	147.241	10.4	16.4567	449.775	250
1534	0.0667	191.499	11.4	11.6222	1754.12	250
1535	0.0667	198.936	8.5	16.2787	914.543	250
1536	0.0667	209.31	10.9	13.5322	1304.35	250
1537	0.0667	392.744	12.9	21.7275	764.618	250
1538	0.0667	23.2834	5.7	12.825	359.82	261
1539	0.08	40.5125	8.2	12.2615	812.5	261
1540	0.0667	9.53523	4.3	6.19016	914.543	261
1541	0.0667	35.8771	11.7	12.7774	464.768	261
1542	0.0667	47.4813	12.5	15.0931	434.783	261
1543	0.0667	2.53373	1.6	8.9125	119.94	261
1544	0.0667	46.1169	11.2	12.55	809.595	261
1545	0.0667	46.5817	9.2	10.6177	1184.41	261
1546	0.0667	56.7466	8.8	12.6857	1049.48	261
1547	0.0667	67.2564	1.1	13.2269	1169.42	261
1548	0.0667	79.3853	9.1	13.2912	1199.4	261
1549	0.0667	32.6987	8.6	9.56977	1289.36	261
1550	0.0667	50.2399	5.5	10.0784	1109.45	261
1551	0.0667	1.28936	2	8.22	74.9625	261
1552	0.0667	16.4768	14.6	15.6546	164.918	261
1553	0.0667	22.3238	11.1	9.71277	704.648	261
1554	0.0667	28.081	5.3	7.84628	1814.09	261
1555	0.0667	32.1439	11.8	14.3385	389.805	261
1556	0.0667	50.1499	9.8	18.0609	344.828	261
1557	0.0667	53.7181	8.2	13.6769	779.61	261
1558	0.0667	58.5307	14.6	14.0188	719.64	261
1559	0.0667	67.2864	8.2	12.5986	1064.47	261
1560	0.0667	125.922	16.1	15.1506	1274.36	261
1561	0.0667	31.0945	7.3	9.91528	1079.46	261
1562	0.0667	41.7241	8.6	11.3903	929.535	261
1563	0.0667	51.1694	1.5	9.67899	1784.11	261
1564	0.0667	52.6237	8.3	11.2136	1214.39	261
1565	0.08	21.875	4.7	9.59111	562.5	270
1566	0.08	42.425	7.4	10.2989	1137.5	270
1567	0.0667	97.6612	8.5	11.5963	1604.2	270
1568	0.0667	231.619	15.9	30.7035	434.783	270
1569	0.0667	110.12	8.7	15.2195	1154.42	270
1570	0.08	16.15	5.2	9.47963	675	290
1571	0.0667	58.6957	5.4	17.0697	494.753	290
1572	0.0667	95.952	13	15.6117	899.55	290
1573	0.0667	110.51	16.1	15.4321	839.58	290
1574	0.0667	114.348	14	16.0783	899.55	290
1575	0.0667	184.063	13.2	21.9184	734.633	290
1576	0.0667	2.6087	5.1	13.8333	44.9775	290
1577	0.0667	17.7811	4.5	7.91795	1169.42	290
1578	0.0667	33.2534	5.2	10.089	1094.45	290
1579	0.0667	38.4408	4.9	8.66545	1649.18	290
1580	0.08	24.3375	7.9	8.09068	1475	310
1581	0.08	34.7875	9.2	11.2574	675	310
1582	0.08	39.05	6.1	7.56952	2625	310
1583	0.08	39.55	8.9	14.2581	387.5	310
1584	0.08	43.95	6.4	9.91624	1462.5	310
1585	0.08	48.975	6.5	9.8	1712.5	310
1586	0.08	52.775	7	10.4633	1462.5	310
1587	0.08	54.65	5.3	8.85427	2487.5	310
1588	0.08	62.3375	2.8	9.56633	2450	310
1589	0.08	70.925	7.3	11.5168	1412.5	310
1590	0.08	83.15	11.5	16.8196	700	310
1591	0.08	84.1375	9.7	9.38366	3212.5	310
1592	0.08	84.8875	9.4	13.5648	1137.5	310
1593	0.08	90.725	8.9	10.3959	2762.5	310
1594	0.08	94.125	9.3	12.9423	1212.5	310
1595	0.08	99.4125	9.4	12.3478	1675	310
1596	0.08	108.375	9.7	10.4633	3100	310
1597	0.08	114.05	9.1	11.5782	2462.5	310
1598	0.08	115.75	7.9	13.193	1787.5	310
1599	0.08	123.662	9.5	11.7694	2862.5	310
1600	0.08	128.188	2	13.3247	1775	310
1601	0.0667	0.77961	3.5	6.05	89.955	310
1602	0.0667	13.6432	5.5	7.70667	674.663	310
1603	0.0667	19.2354	8.7	9.8275	599.7	310
1604	0.0667	19.8651	8.3	9.65122	614.693	310
1605	0.0667	22.9385	8	10.1	584.708	310
1606	0.0667	23.5982	8.1	10.1974	584.708	310
1607	0.0667	27.4063	5.2	7.96061	1484.26	310
1608	0.0667	27.7511	7.1	9.81569	764.618	310
1609	0.0667	39.1754	8.8	12.4152	494.753	310
1610	0.0667	42.024	8.3	8.757	1499.25	310
1611	0.0667	42.9235	7.2	8.92143	1469.27	310
1612	0.0667	44.4828	10.9	12.5395	644.678	310
1613	0.0667	54.7076	7.8	10.4051	1184.41	310
1614	0.0667	68.9205	9	9.69391	1724.14	310
1615	0.0667	70.8546	9.6	13.0741	869.565	310
1616	0.0667	82.4888	8.9	8.34502	3163.42	310
1617	0.0667	82.5787	7.5	9.41176	2803.6	310
1618	0.0667	90.9745	6.8	8.64811	3178.41	310
1619	0.0667	97.3613	10.3	11.8732	1454.27	310
1620	0.0667	97.4213	9.2	10.9364	2098.95	310
1621	0.0667	98.066	9.5	10.7167	1889.06	310
1622	0.0667	99.0105	10.7	10.2335	2323.84	310
1623	0.0667	111.814	8.1	12.1285	1739.13	310
1624	0.0667	121.229	2.2	10.6308	2383.81	310
1625	0.0667	139.295	10.6	9.45	3898.05	310
1626	0.0667	140.705	14.3	15.8812	1034.48	310
1627	0.0667	142.114	9.3	15.9938	1214.39	310
1628	0.0667	142.834	11.1	12.9944	1874.06	310
1629	0.0667	162.894	7.7	11.0325	2998.5	310
1630	0.0667	190.42	7.8	9.03068	6206.9	310
1631	0.0667	201.049	11.2	12.4428	2698.65	310
1632	0.0667	221.289	12.8	14.5258	1919.04	310
1633	0.0667	222.264	12.2	12.9927	2458.77	310
1634	0.0667	4.78261	4.3	6.08095	629.685	310
1635	0.0667	5.02249	5.6	6.17813	479.76	310
1636	0.0667	7.01649	4.5	6.31346	779.61	310
1637	0.0667	14.093	8.3	7.84138	869.565	310
1638	0.0667	16.1319	6.5	9.32121	494.753	310
1639	0.0667	23.7781	5	7.48851	1304.35	310
1640	0.0667	23.8831	5.5	9.1434	794.603	310
1641	0.0667	27.5262	4.5	8.16024	1244.38	310
1642	0.0667	30.7796	9	11.3697	494.753	310
1643	0.0667	30.8846	6.6	8.4358	1214.39	310
1644	0.0667	32.1289	5.5	7.66159	2068.97	310
1645	0.0667	33.1034	1	18.9	134.933	310
1646	0.0667	40.09	6.8	10.0037	809.595	310
1647	0.0667	40.3298	8.3	10.7429	629.685	310
1648	0.0667	41.0495	8	8.88738	1544.23	310
1649	0.0667	45.8921	8.2	10.1169	974.513	310
1650	0.0667	50.8696	9	10.9149	1004.5	310
1651	0.0667	51.8741	12.5	13.9529	509.745	310
1652	0.0667	58.2609	7.8	11.341	914.543	310
1653	0.0667	60.4048	6.8	10.208	1499.25	310
1654	0.0667	69.2354	10	12.6478	1034.48	310
1655	0.0667	69.4003	13	13.922	749.625	310
1656	0.0667	69.5652	15	17.3333	404.798	310
1657	0.0667	72.6687	9.8	11.3964	1259.37	310
1658	0.0667	77.6612	5.6	9.24962	1994	310
1659	0.0667	80.09	7.4	9.9042	1784.11	310
1660	0.0667	90.8996	11.5	16.4805	614.693	310
1661	0.0667	96.2969	11.5	9.82077	2743.63	310
1662	0.0667	96.5217	6.5	10.6985	2068.97	310
1663	0.0667	97.2714	11.8	10.8763	2023.99	310
1664	0.0667	101.334	9.5	10.708	2053.97	310
1665	0.0667	102.504	10.5	16.2857	524.738	310
1666	0.0667	105.457	10.5	11.4105	1859.07	310
1667	0.0667	113.328	14.7	15.63	899.55	310
1668	0.0667	113.448	11.2	13.9633	899.55	310
1669	0.0667	115.157	8.6	10.4279	2743.63	310
1670	0.0667	118.321	9.8	9.93077	2923.54	310
1671	0.0667	120.27	12	10.7486	2683.66	310
1672	0.0667	121.169	9.5	12.1612	1739.13	310
1673	0.0667	121.229	16.2	17.6049	614.693	310
1674	0.0667	130.675	13	17.2413	689.655	310
1675	0.0667	133.838	14.3	15.9055	1094.45	310
1676	0.0667	136.912	10.8	12.4167	1619.19	310
1677	0.0667	139.505	8.4	12.1068	2203.9	310
1678	0.0667	144.048	9.5	10.8995	2893.55	310
1679	0.0667	144.633	7	15.3875	959.52	310
1680	0.0667	144.723	12.5	12.8077	1754.12	310
1681	0.0667	147.016	11.6	14.1735	1529.24	310
1682	0.0667	155.307	15	14.2935	1619.19	310
1683	0.0667	158.111	12	11.6316	2803.6	310
1684	0.0667	162.699	2	11.8073	2863.57	310
1685	0.0667	172.084	11	12.7532	2308.85	310
1686	0.0667	175.097	12.5	14.6021	1424.29	310
1687	0.0667	179.025	12.1	13.2924	1964.02	310
1688	0.0667	181.709	4.5	13.9235	2038.98	310
1689	0.0667	183.688	13.5	13.1686	2338.83	310
1690	0.0667	186.807	17	17.8169	1064.47	310
1691	0.0667	200.99	13.7	14.9581	1754.12	310
1692	0.0667	207.406	15.5	14.3255	2053.97	310
1693	0.0667	209.79	10.3	14.7097	2009	310
1694	0.0667	232.669	16.7	18.162	1064.47	310
1695	0.0667	236.642	15.8	17.6034	1304.35	310
1696	0.0667	266.612	20.8	23.3882	764.618	310
1697	0.0667	271.274	14	16.6461	1724.14	310
1698	0.0667	287.376	13.3	14.8224	2473.76	310
1699	0.0667	332.549	20	22.9427	1019.49	310
1700	0.0667	0.05997	2.3	5.2	14.9925	310
1701	0.0667	1.1994	1.9	6.3	164.918	310
1702	0.0667	3.49325	2.5	9.4	119.94	310
1703	0.0667	7.0015	4.5	7.98214	419.79	310
1704	0.0667	7.61619	4.6	6.95	719.64	310
1705	0.0667	8.32084	7.5	8.03667	449.775	310
1706	0.0667	8.38081	2.2	7.01481	809.595	310
1707	0.0667	9.25037	4.2	7.6381	629.685	310
1708	0.0667	9.50525	1.1	23.6	29.985	310
1709	0.0667	23.5382	8.3	15.4461	194.903	310
1710	0.0667	24.1079	1.6	6.85918	2203.9	310
1711	0.0667	26.4618	8.3	10.9513	584.708	310
1712	0.0667	27.0165	6.4	8.93571	1049.48	310
1713	0.0667	28.006	6.6	9.45588	1019.49	310
1714	0.0667	28.051	6.5	7.88627	1529.24	310
1715	0.0667	28.066	5.9	9.91311	914.543	310
1716	0.0667	33.958	5.9	7.77286	2098.95	310
1717	0.0667	38.8306	1.3	12.1771	719.64	310
1718	0.0667	39.8351	11.9	16.4706	254.873	310
1719	0.0667	42.2039	6	8.51971	2053.97	310
1720	0.0667	43.2684	7.2	10.24	1124.44	310
1721	0.0667	43.4033	8.2	9.62391	1379.31	310
1722	0.0667	48.2309	8.7	8.99921	1904.05	310
1723	0.0667	52.1739	5.7	9.53402	1454.27	310
1724	0.0667	67.0915	8.4	10.8481	1589.21	310
1725	0.0667	75.4273	10.8	10.5088	1709.15	310
1726	0.0667	75.982	8.3	10.7727	1754.12	310
1727	0.0667	86.1319	8.6	10.9465	1904.05	310
1728	0.0667	97.916	8.7	14.593	1064.47	310
1729	0.0667	104.033	9.2	10.5822	2188.91	310
1730	0.0667	106.972	4.9	9.44883	3193.4	310
1731	0.0667	117.466	10.5	12.9243	1604.2	310
1732	0.0667	120.195	8	13.015	1604.2	310
1733	0.0667	126.177	7.6	13.3471	1529.24	310
1734	0.0667	148.291	13	18.6107	839.58	310
1735	0.0667	167.541	11.1	14.8633	1634.18	310
1736	0.0667	174.843	13	12.2475	2683.66	310
1737	0.0667	307.766	1.8	17.2882	1904.05	310
1738	0.0667	320.075	10.2	16.7456	2398.8	310
1739	0.0667	1.94903	4.8	8.14286	104.948	310
1740	0.0667	10.2099	7.5	7.34444	674.663	310
1741	0.0667	22.099	6.1	7.87375	1199.4	310
1742	0.0667	29.4603	8.4	9.16984	944.528	310
1743	0.0667	56.7916	12	12.9098	764.618	310
1744	0.0667	60.7346	1.9	9.08322	2143.93	310
1745	0.0667	146.147	12.2	13.4951	1514.24	310
1746	0.0667	3.47826	4.6	6.7	299.85	310
1747	0.0667	6.11694	5.6	6.20889	674.663	310
1748	0.0667	8.89055	5.7	7.61111	539.73	310
1749	0.0667	13.4783	7.7	8.99714	524.738	310
1750	0.0667	14.8426	2.4	9.475	479.76	310
1751	0.0667	18.7106	5.1	9.94722	539.73	310
1752	0.0667	19.7001	6.3	8.40656	914.543	310
1753	0.0667	20.1499	8.5	11.7546	329.835	310
1754	0.0667	21.0645	4	11.9261	344.828	310
1755	0.0667	25.1424	8.5	10.4316	569.715	310
1756	0.0667	27.1364	10.2	10.5114	659.67	310
1757	0.0667	27.4963	7.6	8.34405	1259.37	310
1758	0.0667	28.9355	8.2	9.81818	824.588	310
1759	0.0667	29.985	6.8	13.3733	449.775	310
1760	0.0667	30.075	7.4	10.5051	584.708	310
1761	0.0667	31.3943	5.5	8.31209	1364.32	310
1762	0.0667	35.1574	6.8	9.38243	1109.45	310
1763	0.0667	38.3508	9.8	12.7868	569.715	310
1764	0.0667	39.1454	5.8	9.33146	1334.33	310
1765	0.0667	41.6042	9.8	9.47375	1199.4	310
1766	0.0667	41.7091	7	9.2	1229.39	310
1767	0.0667	44.6477	2.2	9.18148	1619.19	310
1768	0.0667	45.8771	7.5	8.71491	1709.15	310
1769	0.0667	45.952	13.3	17.8444	269.865	310
1770	0.0667	49.4153	5.7	11.159	914.543	310
1771	0.0667	49.94	11	12.3704	809.595	310
1772	0.0667	51.4093	6.9	9.52613	1664.17	310
1773	0.0667	57.1214	5.7	10.7253	1424.29	310
1774	0.0667	59.2654	17.1	17.76	299.85	310
1775	0.0667	60.015	8.3	11.0173	1214.39	310
1776	0.0667	60.4948	13.6	14.95	479.76	310
1777	0.0667	64.1829	11.6	11.9424	989.505	310
1778	0.0667	66.5217	12.3	12.7094	959.52	310
1779	0.0667	66.8066	9.2	13.1707	869.565	310
1780	0.0667	69.1454	7.5	9.70071	2098.95	310
1781	0.0667	70.6297	10.8	12.2015	974.513	310
1782	0.0667	73.7931	9.5	13.0359	959.52	310
1783	0.0667	79.4453	9.2	11.5065	1379.31	310
1784	0.0667	81.6642	11.5	13.9158	854.573	310
1785	0.0667	83.1034	7.9	11.0125	2038.98	310
1786	0.0667	87.0915	11.3	13.8281	854.573	310
1787	0.0667	88.1259	8.2	12.4321	1259.37	310
1788	0.0667	89.6102	2.1	14.7981	809.595	310
1789	0.0667	93.5682	9.8	11.2017	1814.09	310
1790	0.0667	96.7316	7.2	9.4839	3073.46	310
1791	0.0667	98.006	8	13.2479	1064.47	310
1792	0.0667	101.499	15.4	17.9645	464.768	310
1793	0.0667	109.865	9.5	10.343	2578.71	310
1794	0.0667	110.63	7.8	9.50901	3493.25	310
1795	0.0667	111.499	9.7	10.9551	2473.76	310
1796	0.0667	113.103	7.1	18.022	614.693	310
1797	0.0667	113.328	10.4	10.9755	2383.81	310
1798	0.0667	113.673	9.5	11.6245	2083.96	310
1799	0.0667	113.913	11.1	16.5278	809.595	310
1800	0.0667	115.337	8.5	9.76439	3073.46	310
1801	0.0667	120.975	1.5	11.0107	2518.74	310
1802	0.0667	143.448	9.9	13.3872	1409.3	310
1803	0.0667	148.501	14	20.3349	644.678	310
1804	0.0667	159.43	10.5	11.1245	2998.5	310
1805	0.0667	173.358	12.1	12.4292	2518.74	310
1806	0.0667	185.337	15	17.4554	1109.45	310
1807	0.0667	196.702	16.2	14.3017	1784.11	310
1808	0.0667	199.625	7.7	14.7131	1949.03	310
1809	0.0667	207.511	7.3	11.9881	3538.23	310
1810	0.0667	252.189	12.2	20.6015	989.505	310
1811	0.0667	257.061	2.1	22.0981	779.61	310
1812	0.0667	0.329835	4	5.3	59.97	310
1813	0.0667	0.53973	2.7	6.5	44.9775	310
1814	0.0667	12.5937	4.4	7.27719	854.573	310
1815	0.0667	13.3133	7.8	9.02414	434.783	310
1816	0.0667	19.5202	4.6	7.34868	1139.43	310
1817	0.0667	25.0375	9.8	10.2641	584.708	310
1818	0.0667	32.9385	7.5	8.09703	1514.24	310
1819	0.0667	42.039	9.5	11.0816	569.715	310
1820	0.0667	52.7736	8.4	11.0923	974.513	310
1821	0.0667	57.3013	11	9.73868	1589.21	310
1822	0.0667	58.6057	6.5	8.67905	2218.89	310
1823	0.0667	67.3463	3	10.8374	1364.32	310
1824	0.0667	77.7661	9.5	10.0116	1934.03	310
1825	0.0667	82.2189	8.5	9.61014	2218.89	310
1826	0.0667	83.6132	9.6	9.49329	2233.88	310
1827	0.0667	93.6582	7	10.8574	1619.19	310
1828	0.0667	99.5802	13.9	17.0386	659.67	310
1829	0.0667	111.424	11	10.5265	2428.79	310
1830	0.0667	117.811	7.4	9.3807	3418.29	310
1831	0.0667	121.664	8.7	12.757	1604.2	310
1832	0.0667	176.897	2.5	11.9603	2683.66	310
1833	0.0667	177.046	8.3	14.7269	1619.19	310
1834	0.0667	186.492	10.9	13.1012	2503.75	310
1835	0.0667	188.021	9.7	9.69757	4932.53	310
1836	0.0667	0.284858	3	5.46667	44.9775	310
1837	0.0667	3.38831	4.5	6.58421	284.858	310
1838	0.0667	6.52174	4.6	6.54091	659.67	310
1839	0.0667	13.973	1.4	10.7118	254.873	310
1840	0.0667	14.7526	7.5	8.29189	554.723	310
1841	0.0667	19.0105	6.2	7.14316	1424.29	310
1842	0.0667	25.6522	6.9	7.96988	1244.38	310
1843	0.0667	30.3748	5.1	7.71509	1589.21	310
1844	0.0667	31.8291	10.3	15.525	239.88	310
1845	0.0667	35.3373	9.5	8.78391	1304.35	310
1846	0.0667	40.6747	11.9	13.6032	464.768	310
1847	0.0667	41.0195	11	10.7906	794.603	310
1848	0.0667	41.7241	9.5	10.2575	599.7	310
1849	0.0667	42.6387	2.5	11.1	749.625	310
1850	0.0667	47.2264	13	14.6148	404.798	310
1851	0.0667	55.3673	13.4	18.5444	269.865	310
1852	0.0667	57.8711	7.2	8.74615	2143.93	310
1853	0.0667	61.8891	8.5	8.65033	2293.85	310
1854	0.0667	68.3808	7.3	9.72683	1844.08	310
1855	0.0667	69.7151	11.5	14.5436	584.708	310
1856	0.0667	73.5232	9	15.9	464.768	310
1857	0.0667	79.3253	8	7.64901	4557.72	310
1858	0.0667	80.5697	12.1	16.7833	449.775	310
1859	0.0667	89.2354	9	11.8153	1274.36	310
1860	0.0667	90.7646	13.7	16.8743	524.738	310
1861	0.0667	98.6507	16.8	23.5688	239.88	310
1862	0.0667	108.771	4.7	10.5392	2293.85	310
1863	0.0667	114.603	8.9	9.69139	3133.43	310
1864	0.0667	119.28	10.7	13.3405	1184.41	310
1865	0.0667	120.195	10.1	15.7963	809.595	310
1866	0.0667	128.501	7.2	13.3513	1199.4	310
1867	0.0667	135.952	5.8	9.17439	4272.86	310
1868	0.0667	138.276	1.5	15.8431	869.565	310
1869	0.0667	138.876	9.1	14.4826	1034.48	310
1870	0.0667	144.123	13.6	10.0445	3538.23	310
1871	0.0667	150.375	10.5	10.3656	3403.3	310
1872	0.0667	151.634	11.3	14.3034	1334.33	310
1873	0.0667	154.288	12.8	14.4596	1334.33	310
1874	0.0667	154.873	14	12.1329	2143.93	310
1875	0.0667	160.675	12.6	12.2373	2128.94	310
1876	0.0667	164.228	13	14.3526	1709.15	310
1877	0.0667	165.457	13.7	12.9319	2113.94	310
1878	0.0667	174.123	10.9	12.5376	1874.06	310
1879	0.0667	178.006	11	15.362	1184.41	310
1880	0.0667	179.835	10.6	11.8989	2803.6	310
1881	0.0667	185.532	10.8	11.6399	2893.55	310
1882	0.0667	190.21	16.5	14.2298	1859.07	310
1883	0.0667	196.192	2	12.3975	2953.52	310
1884	0.0667	197.286	11.4	13.3084	2143.93	310
1885	0.0667	200.69	11.9	14.1055	1904.05	310
1886	0.0667	216.957	9.7	11.9904	2968.52	310
1887	0.0667	227.496	17.2	13.5375	1679.16	310
1888	0.0667	259.37	16.2	15.1515	2009	310
1889	0.0667	290.87	14.9	19.9163	1199.4	310
1890	0.0667	307.361	12.9	22.2738	974.513	310
1891	0.0667	335.427	13.9	15.2207	2818.59	310
1892	0.0667	434.348	19.5	25.5429	944.528	310
1893	0.0667	136.252	13	12.7088	1694.15	310
1894	0.0667	13.4783	4.7	6.3809	1334.33	310
1895	0.0667	14.2729	6.1	7.95417	719.64	310
1896	0.0667	27.3613	5.9	8.85714	944.528	310
1897	0.0667	38.8456	8	9.07126	1304.35	310
1898	0.0667	42.2789	8	12.6595	554.723	310
1899	0.0667	46.7766	15	24.6	119.94	310
1900	0.0667	53.6282	12.1	17.7842	284.858	310
1901	0.0667	58.7556	5.6	9.84019	1604.2	310
1902	0.0667	58.8606	8.2	13.6341	614.693	310
1903	0.0667	62.9685	10.3	8.89126	2743.63	310
1904	0.0667	63.1634	11.2	12.7696	689.655	310
1905	0.0667	63.2384	8.8	15.0132	569.715	310
1906	0.0667	69.0405	8	9.08194	2158.92	310
1907	0.0667	82.099	12	12.5157	1049.48	310
1908	0.0667	89.94	16.1	19.1897	434.783	310
1909	0.0667	99.3103	10	11.7189	1349.33	310
1910	0.0667	99.4003	11.1	15.1157	764.618	310
1911	0.0667	109.085	9.6	11.516	1964.02	310
1912	0.0667	115.547	13.2	16.6404	704.648	310
1913	0.0667	121.994	9.6	13.5707	1484.26	310
1914	0.0667	131.919	1.1	13.1632	1709.15	310
1915	0.0667	133.118	15.9	18.1019	779.61	310
1916	0.0667	137.901	10.9	13.2844	1829.09	310
1917	0.0667	142.324	14	16.5108	974.513	310
1918	0.0667	144.108	10.8	12.6817	1889.06	310
1919	0.0667	152.069	14.8	15.9527	1109.45	310
1920	0.0667	153.043	12.4	17.7017	899.55	310
1921	0.0667	153.913	11.9	17.7763	884.558	310
1922	0.0667	155.007	15.6	14.3167	1529.24	310
1923	0.0667	156.432	12.6	12.2785	2233.88	310
1924	0.0667	165.562	10	14.2733	1739.13	310
1925	0.0667	197.286	15.8	18.1284	1109.45	310
1926	0.0667	198.846	12.5	13.622	2383.81	310
1927	0.0667	201.874	13.1	15.1664	1604.2	310
1928	0.0667	229.235	15.6	19.4485	1019.49	310
1929	0.0667	260.255	16.8	20.6414	1049.48	310
1930	0.0667	292.054	18	20.2835	1274.36	310
1931	0.0667	4.57271	1.8	6.07429	524.738	310
1932	0.0667	24.1529	5	7.74368	1304.35	310
1933	0.0667	33.1934	5	7.11049	2428.79	310
1934	0.0667	34.2429	7	10.3317	899.55	310
1935	0.0667	41.8441	5	9.13846	1559.22	310
1936	0.0667	45.8321	9.3	9.26696	1679.16	310
1937	0.0667	70.5247	8	10.3867	1799.1	310
1938	0.0667	80.6297	7.1	8.81855	3313.34	310
1939	0.0667	81.2444	9.8	11.2644	1724.14	310
1940	0.0667	89.5652	5.2	9.35024	3073.46	310
1941	0.0667	114.348	11.3	13.813	1154.42	310
1942	0.0667	120.81	2.2	9.03138	4347.83	310
1943	0.0667	123.553	11	12.8863	1964.02	310
1944	0.0667	167.151	9	12.6181	2398.8	310
1945	0.0667	219.91	10.5	14.9067	2248.88	310
1946	0.0667	285.067	15.3	12.6932	4437.78	310
1947	0.0667	428.321	17.2	13.8271	5247.38	310
1948	0.0667	14.078	7.5	10.4304	344.828	310
1949	0.0667	22.039	9.8	12.5913	344.828	310
1950	0.0667	26.9865	9.7	9.97593	809.595	310
1951	0.0667	27.3763	6.3	9.0125	1079.46	310
1952	0.0667	44.9775	12	13.5	14.9925	310
1953	0.0667	49.0105	10.2	14.803	494.753	310
1954	0.0667	92.6837	15.6	15.9722	809.595	310
1955	0.0667	112.444	10.5	14	14.9925	310
1956	0.08	23.85	9.7	11.6559	425	310
1957	0.0667	10.7496	9.7	10.1389	269.865	310
1958	0.0667	12.1439	8.5	9.16818	329.835	310
1959	0.0667	25.1424	7	7.8975	1199.4	310
1960	0.0667	34.093	9.8	11.7892	554.723	310
1961	0.0667	39.2354	9.6	11.0091	824.588	310
1962	0.0667	39.6402	16.9	19.1692	194.903	310
1963	0.0667	39.7301	7.2	10.1618	1019.49	310
1964	0.0667	44.9925	13.3	16.1842	284.858	310
1965	0.0667	47.2114	7.3	14.2586	434.783	310
1966	0.0667	52.4738	8.8	11.2	14.9925	310
1967	0.0667	60.2699	8.2	10.6409	1319.34	310
1968	0.0667	60.6297	14.6	12.975	899.55	310
1969	0.0667	61.1844	8.6	11.2036	1259.37	310
1970	0.0667	68.1409	13.6	12.2643	1049.48	310
1971	0.0667	73.7331	11.1	11.3753	1454.27	310
1972	0.0667	93.0735	12.5	16.04	674.663	310
1973	0.0667	97.4513	14.5	16	14.9925	310
1974	0.0667	147.691	13.9	15.0195	1304.35	310
1975	0.0667	7.24138	7	8.86667	314.843	320
1976	0.08	60.4125	7.7	12.6329	1062.5	320
1977	0.0667	72.7736	8.3	9.92647	1019.49	320
1978	0.0667	283.088	15.6	22.4808	779.61	320
1979	0.0667	286.612	11.8	16.4469	1949.03	320
1980	0.0667	222.189	9.2	14.9409	2053.97	320
1981	0.0667	88.5307	11.8	13.822	884.558	320
1982	0.0667	163.913	10.9	13.3651	1889.06	320
1983	0.0667	191.859	14.4	12.1982	2458.77	320
1984	0.0667	252.789	1	28.7375	479.76	320
1985	0.0667	295.877	18.2	30.2586	434.783	320
1986	0.0667	1.52924	2.9	6.63636	164.918	350
1987	0.0667	3.25337	7.3	8.95	179.91	350
1988	0.0667	5.24738	6	7.46897	434.783	350
1989	0.0667	6.05697	5.7	6.72558	644.678	350
1990	0.0667	7.96102	4.9	6.87358	794.603	350
1991	0.0667	8.26087	5.4	7.02885	779.61	350
1992	0.0667	10	4.3	10.708	374.813	350
1993	0.0667	12.6537	8.4	14.1889	269.865	350
1994	0.0667	13.4483	5	8.21639	914.543	350
1995	0.0667	14.5577	4.4	7.66892	1109.45	350
1996	0.0667	16.3868	6	7.75542	1244.38	350
1997	0.0667	21.2144	5.7	10.0177	929.535	350
1998	0.0667	23.8081	6.6	9.86714	1049.48	350
1999	0.0667	25.5322	8.9	10.9419	929.535	350
[truncated: 2,959 more rows]
